# Supplementary material for: Effect of fenofibrate on plasma apolipoprotein C-III levels: a systematic review and meta-analysis of randomised placebo-controlled trials
Source: PubMed Central journal article supplement — BMJ Open. 2018 Dec 2;8(11):bmjopen-2018-021508. doi: 10.1136/bmjopen-2018-021508 (PMC6278807; doi:10.1136/bmjopen-2018-021508), 2018-12-02
Supplement: bmjopen-2018-021508.draft_revisions.pdf [file bmjopen-2018-021508.draft_revisions.pdf]

# BMJ Open

BMJ Open is committed to open peer review. As part of this commitment we make the peer review history of every article we publish publicly available.

When an article is published we post the peer reviewers' comments and the authors' responses online. We also post the versions of the paper that were used during peer review. These are the versions that the peer review comments apply to.

The versions of the paper that follow are the versions that were submitted during the peer review process. They are not the versions of record or the final published versions. They should not be cited or distributed as the published version of this manuscript.

BMJ Open is an open access journal and the full, final, typeset and author-corrected version of record of the manuscript is available on our site with no access controls, subscription charges or pay-per-view fees (<http://bmjopen.bmj.com>).

If you have any questions on BMJ Open's open peer review process please email [info.bmjopen@bmj.com](mailto:info.bmjopen@bmj.com)

# BMJ Open

## Effect of Fenofibrate on plasma apolipoprotein C-III levels: A Systematic Review and Meta-Analysis of Randomized Placebo-Controlled Trials

|                               |                                                                                                                                                                                                                                                                                                                                                                                                                                  |
|-------------------------------|----------------------------------------------------------------------------------------------------------------------------------------------------------------------------------------------------------------------------------------------------------------------------------------------------------------------------------------------------------------------------------------------------------------------------------|
| Journal:                      | <i>BMJ Open</i>                                                                                                                                                                                                                                                                                                                                                                                                                  |
| Manuscript ID                 | bmjopen-2018-021508                                                                                                                                                                                                                                                                                                                                                                                                              |
| Article Type:                 | Research                                                                                                                                                                                                                                                                                                                                                                                                                         |
| Date Submitted by the Author: | 06-Jan-2018                                                                                                                                                                                                                                                                                                                                                                                                                      |
| Complete List of Authors:     | Sahebkar , Amir; Mashhad University of Medical Sciences<br>Simental-Mendia, Luis; Biomedical Research Unit, Mexican Social Security Institute<br>Katsiki, Niki; Aristotle University of Thessaloniki<br>Reiner, Zeljko; Univ Zagreb, Department of internal medicine<br>Banach, Maciej ; Department of Hypertension<br>Pirro, Matteo; University of Perugia<br>Atkin, Stephen; Weill Cornell Medical College in Qatar, Research; |
| Keywords:                     | fenofibrate, fibrate, apolipoprotein C, meta-analysis                                                                                                                                                                                                                                                                                                                                                                            |
|                               |                                                                                                                                                                                                                                                                                                                                                                                                                                  |

SCHOLARONE™  
Manuscripts

Peer Review Only

# Effect of Fenofibrate on plasma apolipoprotein C-III levels: A Systematic Review and Meta-Analysis of Randomized Placebo-Controlled Trials

**Short title.** Fenofibrate reduces plasma apoC-III

Amirhossein Sahebkar,<sup>1,2,3</sup> Luis E. Simental-Mendía,<sup>4</sup> Niki Katsiki,<sup>5</sup> Željko Reiner,<sup>6</sup> Maciej Banach,<sup>7,8</sup> Matteo Pirro,<sup>9</sup> Stephen L. Atkin<sup>10\*</sup>

<sup>1</sup>*Biotechnology Research Center, Pharmaceutical Technology Institute, Mashhad University of Medical Sciences, Mashhad, Iran*

<sup>2</sup>*Neurogenic Inflammation Research Center, Mashhad University of Medical Sciences, Mashhad, Iran*

<sup>3</sup>*School of Pharmacy, Mashhad University of Medical Sciences, Mashhad, Iran*

<sup>4</sup>*Biomedical Research Unit, Mexican Social Security Institute, Durango, Mexico*

<sup>5</sup>*Second Propedeutic Department of Internal Medicine, Medical School, Aristotle University of Thessaloniki, Hippocraton Hospital, Thessaloniki, Greece*

<sup>6</sup>*University Hospital Center Zagreb, Department of Internal medicine, Kišpatićeva 12, University of Zagreb, Croatia*

<sup>7</sup>*Department of Hypertension, WAM University Hospital in Lodz, Medical University of Lodz, Zeromskiego 113, Lodz, Poland*

<sup>8</sup>*Polish Mother's Memorial Hospital Research Institute (PMMHRI), Lodz, Poland*

<sup>9</sup>*Unit of Internal Medicine, Angiology and Arteriosclerosis Diseases, Department of Medicine, University of Perugia, Perugia, Italy*

<sup>10</sup>*Weill Cornell Medicine Qatar, Education City, PO Box 24144, Doha, Qatar*

**\*Corresponding author:** Stephen L Atkin. Weill Cornell Medicine Qatar, Education City, PO Box 24144, Doha, Qatar. Tel: +97455635807. Fax +97444928422. Email: sla2002@qatar-med.cornell.edu

**Word count: 2116**

**Key words:** Fenofibrate; fibrate; apoprotein C; triglyceride; meta-analysis.

1  
2  
3  
4  
5  
6  
7  
8  
9  
10  
11  
12  
13  
14  
15  
16  
17  
18  
19  
20  
21  
22  
23  
24  
25  
26  
27  
28  
29  
30  
31  
32  
33  
34  
35  
36  
37  
38  
39  
40  
41  
42  
43  
44  
45  
46  
47  
48  
49  
50  
51  
52  
53  
54  
55  
56  
57  
58  
59  
60

For peer review only

## ABSTRACT

**Objectives.** This meta-analysis of randomized placebo-controlled clinical trials aimed to assess the effect of fenofibrate on apolipoprotein C-III (apo C-III), a key regulator of triglyceride metabolism.

**Participants.** Randomized placebo-controlled trials investigating the impact of fenofibrate treatment on apo C-III levels were searched in PubMed-Medline, SCOPUS, Web of Science and Google Scholar databases. Quantitative data synthesis was determined by a random-effects model and generic inverse variance method. Sensitivity analysis was conducted using the leave-one-out method. A weighted random-effects meta-regression was performed to evaluate glycemic parameter confounders.

**Results.** Meta-analysis of 11 clinical trials involving 507 subjects showed fenofibrate therapy decreased apo C-III levels (weighted mean difference (WMD): -4.56 mg/dL, 95% confidence interval (CI): -6.53, -2.58,  $p < 0.001$ ;  $I^2$ : 64.67%). Subgroup analysis showed that fenofibrate reduced plasma apo C-III concentrations in subgroups of trials with treatment durations of either  $< 12$  weeks (WMD: -4.50 mg/dL,  $p = 0.001$ ) or  $\geq 12$  weeks (WMD: -4.73 mg/dL,  $p = 0.009$ ) and doses of fenofibrate  $< 200$  mg/day ( $p < 0.001$ ) and  $> 200$  mg/day ( $p = 0.006$ ), with no significant difference between the subgroups.

**Conclusion.** This meta-analysis found that fenofibrate therapy significantly decreases apo C-III levels, an effect evident with both short term treatment and doses less than 200 mg/day.

**Keywords:** fenofibrate; glucose; apolipoprotein C-III; meta-analysis.

### Strengths and limitations

- A strength was the use of this meta-analysis to look at the effect of fenofibrate on plasma apo C-III levels, and that showed a significant reduction of apo C-III by fenofibrate.
- The meta-analysis showed that apo C-III reduction by fenofibrate was independent of treatment dose and duration.
- A limitation was that the number of clinical trials was limited to analyse with only 507 subjects in total

## INTRODUCTION

Elevated triglycerides have been shown to be an independent marker of coronary artery disease (CAD) [1] [2] [3]. Apolipoprotein C-III (apo C-III) is a key regulator of triglyceride metabolism that mediates its effects through lipoprotein lipase (LPL) inhibition. However, indirect LPL-independent mechanisms are also present, shown by inhibition of ApoC-III messenger RNA and a reduction of apoC-III levels in patients with LPL deficiency [4] [5]. Apo C-III also inhibits hepatic lipase activity that decreases the conversion of very-low-density lipoprotein (VLDL) to intermediate-density lipoprotein (IDL) and low-density lipoprotein (LDL) [6]. Recently, apo C-III was shown to be significantly associated with incident CAD in the EPIC-Norfolk prospective population study [7]. It has been suggested that apoC-III may exert atherogenic properties by both direct (via enhancing inflammation) and indirect (*via* promoting hypertriglyceridemia) mechanisms [8].

Fibrates are a therapeutic class of drugs that are used primarily for the treatment of hypertriglyceridemia, but are also for combined dyslipidemias in which both triglycerides and LDL-cholesterol are elevated [9] [10] [11]. Fibrates also have several pleiotropic activities described recently [12-18]. Fenofibrate is the most commonly used fibrate that induces lipoprotein lipolysis, fatty acid uptake and increase high-density lipoprotein (HDL) production [19] [20], while reducing plasma triglyceride levels by 20-30% [21]. Mechanistically, fenofibrate activates peroxisome proliferator activated receptor alpha (PPAR $\alpha$ ) through modulation of genes expression related to fatty acid and lipoprotein metabolism [22] [23, 24].

This meta-analysis of randomized placebo-controlled clinical trials using fenofibrate therapy aimed to determine its effect on apo C-III levels.

## METHODS

### Search Strategy

This study was designed according to the guidelines of the preferred reporting items for systematic reviews and meta-analysis (PRISMA) statement[25]. PubMed-Medline, Scopus and ISI Web of Knowledge databases were searched using the following search terms in titles and abstracts: fenofibrate AND (apoCIII OR apoC-III OR "apo CIII" OR "apo C-III" OR apoC3 OR "apo C3") AND (placebo OR placebo-controlled). The wild-card term “\*” was used to increase the sensitivity of the search strategy. The search was limited to articles published in English language. The literature was searched from inception to August 18, 2017.

### Study Selection

Original studies were included if they met the following inclusion criteria: (i) being a randomized placebo-controlled clinical trial with either parallel or cross-over design, (ii) investigating the impact of fenofibrate versus placebo on total circulating concentrations of apoC-III, and, (iii) presentation of sufficient information on apoC-III concentrations at baseline and at study end in both intervention and placebo groups or providing the net change values. Exclusion criteria were: (i) non-clinical studies, (ii) uncontrolled OR non-placebo-controlled studies, (iii) observational studies with case-control, cross-sectional or cohort design, (iv) reporting postprandial plasma apoC-III levels, and (v) lack of sufficient information on baseline or follow-up total circulating apoC-III levels.



## Data extraction

Eligible studies were reviewed and the following data were abstracted: 1) first author's name, 2) year of publication, 3) country where the study was performed, 4) study design, 5) number of participants in the statin and control groups, 6) fenofibrate dose, 7) duration of treatment, 8) age, gender and body mass index (BMI) of study participants, and 9) baseline and follow-up concentrations of plasma lipids, lipoproteins and apolipoproteins including apoC-III. When apoC-III data were incompletely reported, authors of the respective article were contacted to obtain missing information.

## Quality assessment

The quality of involved studies in this meta-analysis was evaluated using the Cochrane criteria. Risk of bias in the studies considered in this meta-analysis was evaluated according to the Cochrane instructions [26].

## Quantitative Data Synthesis

Meta-analysis was conducted using Comprehensive Meta-Analysis (CMA) V2 software (Biostat, NJ). A random-effects model (using DerSimonian-Laird method) and the generic inverse variance weighting method were used to compensate for the heterogeneity of studies in terms of study design, treatment duration, and the characteristics of populations being studied. Standard deviations (SDs) of  $(SD_{\text{pre-treatment}})^2 + (SD_{\text{post-treatment}})^2 - (2R \times SD_{\text{pre-treatment}} \times SD_{\text{post-treatment}})$ , assuming a correlation coefficient (R) = 0.5. Where standard error of the mean (SEM) was only reported, standard deviation (SD) was estimated using the following formula:  $SD = SEM \times \sqrt{n}$ , where  $n$  is the number of subjects. Heterogeneity was assessed quantitatively using Cochrane

1  
2  
3  
4 Q and  $I^2$  statistic. All apo C-III values were collated in mg/L. Effect sizes were expressed as  
5  
6 standardized mean difference (WMD) and 95% confidence interval (CI). In order to avoid the  
7  
8 double-counting problem in trials comparing multiple treatment arms versus a single control  
9  
10 group, the number of subjects in the control group were divided by the number of treatment  
11  
12 arms. In order to evaluate the influence of each study on the overall effect size, a sensitivity  
13  
14 analysis was conducted using the leave-one-out method (i.e., removing one study each time and  
15  
16 repeating the analysis) [27, 28].  
17  
18  
19

### 20 **Meta-regression**

21  
22 As potential confounders of treatment response, the duration of treatment and baseline plasma  
23  
24 apoC-III concentrations were entered into a random-effects meta-regression model to explore  
25  
26 their association with the estimated effect size on plasma apoC-III levels.  
27  
28  
29  
30  
31

### 32 **Publication bias**

33  
34 Evaluation of funnel plot, Begg's rank correlation and Egger's weighted regression tests were  
35  
36 performed to assess the presence of publication bias in the meta-analysis. When there was  
37  
38 evidence of funnel plot asymmetry, potentially missing studies were imputed using the "trim and  
39  
40 fill" method [29]. In case of a significant result, the number of potentially missing studies  
41  
42 required to make the  $p$ -value non-significant was estimated using the "fail-safe N" method as  
43  
44 another marker of publication bias.  
45  
46  
47  
48  
49  
50  
51  
52  
53

## RESULTS

Overall, 61 articles were found following multi-database search. After screening of titles and abstracts, 22 articles were assessed in full text. Of these 5 articles were excluded because of lack of reporting serum/plasma total apo C-III concentrations, 3 because of duplicate reporting of data from the same population, 2 because of reporting postprandial apo C-III levels, and 1 because of incomplete data on apo C-III levels. Therefore, 11 articles were found to be eligible for inclusion in the meta-analysis (**Figure 1**).

### Study characteristics

Data were pooled from 11 randomized placebo-controlled clinical trials comprising a total of 507 subjects, including 280 and 227 participants in the fenofibrate and placebo arms respectively (individuals of the cross-over trials were considered in the treatment and control groups) [30-40]. Clinical trials reported different doses of fenofibrate. The included studies were published between 2002 [38] [34] and 2016. Treatment duration ranged from 2 weeks [36] [40] up to 12 weeks [30] [31] [31] [33] [34]. Study designs of included trials were parallel [30] [41] [34] [36] and cross-over [31] [33] [35] [37] [38] [39, 40]. Selected studies enrolled subjects with metabolic syndrome [30], type 2 diabetes [31] [33], hypertriglyceridemia [32, 35, 38], dyslipidemia [34] [36] and nondiabetic subjects [40]. Characteristics of the included clinical trials are presented in

#### Table 1.

**Table 1.** Demographic characteristics of the included studies.

| Author | Study design | Target Population | Treatment duration | n | Study group | Age, years | Female (n, %) | BMI, (kg/m <sup>2</sup> ) | Total cholesterol | LDL cholesterol | HDL cholesterol | Triglycerides | ApoC-III |
|--------|--------------|-------------------|--------------------|---|-------------|------------|---------------|---------------------------|-------------------|-----------------|-----------------|---------------|----------|
|--------|--------------|-------------------|--------------------|---|-------------|------------|---------------|---------------------------|-------------------|-----------------|-----------------|---------------|----------|

|                         |                                                          |                      | n        |    | (%)                    | (mg/dl)   | (mg/dl)   | (mg/dl)           | (mg/dl)    | (mg/dl)    |           |                     |          |
|-------------------------|----------------------------------------------------------|----------------------|----------|----|------------------------|-----------|-----------|-------------------|------------|------------|-----------|---------------------|----------|
| Belfort et al. (2010)   | Randomized, double-blind, placebo-controlled             | Metabolic syndrome   | 12 weeks | 16 | Fenofibrate 200 mg/day | 46±8      | 5 (31)    | 31.6±4            | 228±72     | 109±56     | 34±8      | 500±284             | 52.7±2.3 |
|                         |                                                          |                      |          | 9  | Placebo                | 46±9      | 3 (33)    | 31.5±3            | 219±33     | 117±30     | 34±9      | 343±126             | 35.5±1.2 |
| Chan et al. (2010)      | Randomized, double-blind, placebo-controlled, cross-over | Type 2 diabetes      | 12 weeks | 15 | Fenofibrate 145 mg/day | 63±8      | 2 (13)    | 28.6±3.4          | 143.1±14.7 | 73.5±23.2  | 44.9±9.3  | 115.1±53.1          | 14.0±4.6 |
|                         |                                                          |                      |          | 15 | Placebo                | 63±8      | 2 (13)    | 28.5±3.0          | 139.2±14.7 | 73.5±23.2  | 41.8±12.0 | 97.4±70.9           | 13.8±5.4 |
| Davison et al. (2006)   | Randomized, double-blind, placebo-controlled             | Hypertriglyceridemia | 8 weeks  | 96 | Fenofibrate 130 mg/day | 56.5±9.7  | 37 (38.5) | 30.8±3.9          | 245±48.9   | 121±39.1   | 36±9.7    | 480±186             | 32±9.7   |
|                         |                                                          |                      |          | 50 | Placebo                | 55.3±7.0  | 20 (40.0) | 31.5±4.9          | 237±42.4   | 116±42.4   | 35±7.0    | 479±148             | 30±7.0   |
| Hamilton et al. (2010)  | Randomized, double-blind, placebo-controlled, cross-over | Type 2 diabetes      | 12 weeks | 15 | Overall                | 63.3±7.8  | 2 (13)    | 28.4 (26.8-30.1)* | 150.8±27.1 | 77.3±15.5  | 45.2±6.6  | 124.0 (97.4-159.4)* | ND       |
|                         |                                                          |                      |          | 15 | Fenofibrate 145 mg/day | ND        | ND        | ND                | 143.1±14.7 | 73.5±23.2  | 44.5±5.8  | 115.1±53.1**        | 13.9±4.8 |
|                         |                                                          |                      |          | 15 | Placebo                | ND        | ND        | ND                | 139.2±14.7 | 73.5±23.2  | 43.7±7.3  | 97.4±70.9**         | 13.7±5.3 |
| Ishibashi et al. (2016) | Randomized, double-blind, placebo-controlled             | Dyslipidemia         | 12 weeks | 36 | Fenofibrate 100 mg/day | 51.1±11.5 | 3 (8)     | 26.6±3.0          | 232.0±41.8 | 134.2±35.2 | 40.2±7.3  | 326.0±204.6         | 15.9±4.8 |
|                         |                                                          |                      |          | 35 | Placebo                | 48.7±9.0  | 1 (3)     | 26.8±2.6          | 225.1±30.5 | 128.4±29.4 | 40.2±6.2  | 309.1±130.2         | 14.9±4.5 |

| d                      |                                                         |                      |         |    |                        |          |         |          |           |           |          |            |          |
|------------------------|---------------------------------------------------------|----------------------|---------|----|------------------------|----------|---------|----------|-----------|-----------|----------|------------|----------|
| Kazumi et al. (2003)   | Randomized, double-blind, placebo-controlled, crossover | Hypertriglyceridemia | 8 weeks | 43 | Overall                | 57.1±9.1 | 5 (11)  | 24.3±2.6 |           |           |          |            |          |
|                        |                                                         |                      |         | 21 | Fenofibrate 300 mg/day | ND       | ND      | ND       | 238±45.8  | ND        | 40.0±1.0 | 352±274    | 17.9±8.2 |
|                        |                                                         |                      |         | 22 | Placebo                | ND       | ND      | ND       | 245±51.5  | ND        | 49.4±2.3 | 342±304    | 20.0±1.7 |
| Kosoglou et al. (2004) | Randomized, single-blind, placebo-controlled            | Dyslipidemia         | 2 weeks | 8  | Fenofibrate 200 mg/day | ND       | ND      | ND       | 239.8±1.0 | 197.2±3.2 | 50.3±2.1 | 132.9±50.0 | 28.2±4.8 |
|                        |                                                         |                      |         | 8  | Placebo                | ND       | ND      | ND       | 266.8±3.2 | 177.9±3.2 | 46.4±1.7 | 186.0±35.4 | 32.5±1.7 |
| Ooi et al. (2012)      | Randomized, double-blind, placebo-controlled, crossover | Metabolic syndrome   | 5 weeks | 11 | Overall                | 46.3±6.9 | 0 (0.0) | 30.5±2.6 |           |           |          |            |          |
|                        |                                                         |                      |         | 11 | Fenofibrate 200 mg/day |          |         |          | 211.9±2.1 | 143.1±2.8 | 40.2±8.9 | 147.0±78.8 | 12.0±1.4 |
|                        |                                                         |                      |         | 11 | Placebo                |          |         |          | 227.4±1.8 | 152.4±2.7 | 36.3±5.0 | 216.1±90.3 | 15.5±1.0 |
| Sasaki et al. (2002)   | Randomized, double-blind, placebo-controlled, crossover | Hypertriglyceridemia | 8 weeks | 50 | Overall                | 54.6±1.7 | 19 (38) | ND       | 241.0±6.5 | 119.2±4.9 | 39.9±1.6 | 431.8±30.5 | 21.7±9.7 |
|                        |                                                         |                      |         | 40 | Fenofibrate 300 mg/day |          |         |          |           |           |          |            |          |
|                        |                                                         |                      |         | 40 | Placebo                |          |         |          |           |           |          |            |          |
| Vega et al. (2003)     | Randomized, placebo-controlled, crossover               | Metabolic syndrome   | 8 weeks | 13 | Overall                | 56.5±8.9 | 0 (0.0) | 30.5±4.2 | ND        | ND        | ND       | ND         | ND       |
|                        |                                                         |                      |         | 13 | Fenofibrate 200 mg/day |          |         |          |           |           |          |            |          |
|                        |                                                         |                      |         | 13 | Placebo                |          |         |          |           |           |          |            |          |

|                      |                                                        | Placebo              |         |    |                        |                 |         |              |         |         |        |          |        |
|----------------------|--------------------------------------------------------|----------------------|---------|----|------------------------|-----------------|---------|--------------|---------|---------|--------|----------|--------|
| Wagner et al. (2005) | Randomized, open-label, placebo-controlled, cross-over | Nondiabetic subjects | 2 weeks | 12 | Overall                | 24 <sup>†</sup> | 0 (0.0) | 27 (21-34)** | ND      | ND      | ND     | ND       | ND     |
|                      |                                                        |                      |         | 9  | Fenofibrate 201 mg/day | ND              | 0 (0.0) | ND           | 170.1±3 | 100.5±2 | 34.8±1 | 186.0±10 | 14.0±5 |
|                      |                                                        |                      |         | 9  | Placebo                | ND              | 0 (0.0) | ND           | 0.9     | 3.2     | 1.6    | 6.3      | 7      |
|                      |                                                        |                      |         |    |                        |                 |         | ND           | 150.8±3 | 88.9±27 | 38.7±7 | 132.9±62 | 10.5±2 |
|                      |                                                        |                      |         |    |                        |                 |         |              | 0.9     | .1      | 7      | 0        | 7      |

Values are expressed as mean ± SD

\*Geometric mean (95% CI)

\*\*Median (IQR)

†Mean only

Abbreviations: ND, no data; BMI, body mass index; IQR, interquartile range.

### Risk of bias assessment

Most of the included studies showed insufficient information regarding the sequence generation and allocation concealment. Moreover, three trials had high risk of bias concerning blinding of participants, personnel and outcome assessors [36] [40]. Nevertheless, all selected studies were characterized by a low risk of bias for incomplete outcome data and selective outcome reporting.

Details of the risk of bias assessment are shown in **Table 2**.

**Table 2.** Quality of bias assessment of the included studies according to the Cochrane guidelines.

| Study                 | Sequence generation | Allocation concealment | Blinding of participants, personnel and outcome assessors | Incomplete outcome data | Selective outcome reporting | Other sources of bias |
|-----------------------|---------------------|------------------------|-----------------------------------------------------------|-------------------------|-----------------------------|-----------------------|
| Belfort et al. (2010) | L                   | U                      | U                                                         | L                       | L                           | U                     |

---

|    |                         |   |   |   |   |   |   |
|----|-------------------------|---|---|---|---|---|---|
| 1  |                         |   |   |   |   |   |   |
| 2  |                         |   |   |   |   |   |   |
| 3  |                         |   |   |   |   |   |   |
| 4  |                         |   |   |   |   |   |   |
| 5  | Chan et al. (2010)      | U | U | U | L | L | U |
| 6  |                         |   |   |   |   |   |   |
| 7  |                         |   |   |   |   |   |   |
| 8  |                         |   |   |   |   |   |   |
| 9  | Davidson et al. (2006)  | U | U | U | L | L | U |
| 10 |                         |   |   |   |   |   |   |
| 11 |                         |   |   |   |   |   |   |
| 12 |                         |   |   |   |   |   |   |
| 13 |                         |   |   |   |   |   |   |
| 14 | Hamilton et al. (2010)  | U | U | U | L | L | U |
| 15 |                         |   |   |   |   |   |   |
| 16 |                         |   |   |   |   |   |   |
| 17 |                         |   |   |   |   |   |   |
| 18 | Ishibashi et al. (2016) | L | U | U | L | L | U |
| 19 |                         |   |   |   |   |   |   |
| 20 |                         |   |   |   |   |   |   |
| 21 |                         |   |   |   |   |   |   |
| 22 | Kazumi et al. (2003)    | U | U | U | L | L | U |
| 23 |                         |   |   |   |   |   |   |
| 24 |                         |   |   |   |   |   |   |
| 25 |                         |   |   |   |   |   |   |
| 26 |                         |   |   |   |   |   |   |
| 27 | Kosoglou et al. (2004)  | U | U | H | L | L | U |
| 28 |                         |   |   |   |   |   |   |
| 29 |                         |   |   |   |   |   |   |
| 30 |                         |   |   |   |   |   |   |
| 31 | Ooi et al. (2012)       | U | U | U | L | L | U |
| 32 |                         |   |   |   |   |   |   |
| 33 |                         |   |   |   |   |   |   |
| 34 |                         |   |   |   |   |   |   |
| 35 | Sasaki et al. (2002)    | U | L | U | L | L | U |
| 36 |                         |   |   |   |   |   |   |
| 37 |                         |   |   |   |   |   |   |
| 38 |                         |   |   |   |   |   |   |
| 39 |                         |   |   |   |   |   |   |
| 40 | Vega et al. (2003)      | U | U | H | L | L | U |
| 41 |                         |   |   |   |   |   |   |
| 42 |                         |   |   |   |   |   |   |
| 43 |                         |   |   |   |   |   |   |
| 44 | Wagner et al. (2005)    | U | U | H | L | L | U |
| 45 |                         |   |   |   |   |   |   |
| 46 |                         |   |   |   |   |   |   |
| 47 |                         |   |   |   |   |   |   |
| 48 |                         |   |   |   |   |   |   |
| 49 |                         |   |   |   |   |   |   |
| 50 |                         |   |   |   |   |   |   |
| 51 |                         |   |   |   |   |   |   |
| 52 |                         |   |   |   |   |   |   |
| 53 |                         |   |   |   |   |   |   |
| 54 |                         |   |   |   |   |   |   |
| 55 |                         |   |   |   |   |   |   |
| 56 |                         |   |   |   |   |   |   |
| 57 |                         |   |   |   |   |   |   |
| 58 |                         |   |   |   |   |   |   |
| 59 |                         |   |   |   |   |   |   |
| 60 |                         |   |   |   |   |   |   |

---

L, low risk of bias; H, high risk of bias; U, unclear risk of bias.

## Quantitative data synthesis

The present meta-analysis of data from 11 randomized placebo-controlled trials found a significant reduction of apo C-III plasma concentrations following treatment with fenofibrate (WMD: -4.56 mg/dL, 95% CI: -6.53, -2.58,  $p < 0.001$ ;  $I^2$ : 64.67%) (**Figure 2**). The effect size was robust in the leave-one-out sensitivity analysis (**Figure 2**) and not mainly driven by any single study. Subgroup analysis showed significant decreases in plasma apo C-III levels caused by fenofibrate in subgroups of trials with treatment durations of either  $< 12$  weeks (WMD: -4.50 mg/dL, 95% CI: -7.17, -1.82,  $p = 0.001$ ;  $I^2$ : 70.74%) or  $\geq 12$  weeks (WMD: -4.73 mg/dL, 95% CI: -8.29, -1.18,  $p = 0.009$ ;  $I^2$ : 61.44%), with no significant difference between the two subgroups ( $p = 0.917$ ). With respect to fenofibrate dose, significant reductions were observed in both subgroups of trials with administered doses of  $< 200$  mg/day (WMD: -5.53 mg/dL, 95% CI: -8.35, -2.70,  $p < 0.001$ ;  $I^2$ : 80.23%) and  $\geq 200$  mg/day (WMD: -3.70 mg/dL, 95% CI: -6.35, -1.05,  $p = 0.006$ ;  $I^2$ : 27.51%). Again, there was no significant difference between the subgroups treated with different fenofibrate doses ( $p = 0.355$ ) (**Figure 3**).

## Meta-regression

Random-effects meta-regression was performed to assess the impact of potential confounders on the effects of fenofibrate on plasma apo C-III levels. The results suggested a significant positive association between the apo C-III-lowering effect of fenofibrate and baseline apo C-III concentrations (slope: -0.41; 95% CI: -0.58, -0.23;  $p < 0.001$ ). However, no significant association between the apo C-III-lowering and triglycerides-lowering effects of fenofibrate was found (slope: 0.11; 95% CI: -0.03, 0.25;  $p = 0.134$ ) (**Figure 4**).



## Publication bias

Visual inspection of Begg's funnel plots revealed a slight asymmetry in the meta-analysis of fenofibrate's effect on plasma apo C-III levels that was imputed by one potentially missing study at the left side of the plot using “trim and fill” method that yielded an adjusted effect size of -4.89 (-6.79, -2.99) (**Figure 5**). Begg's rank correlation ( $p=0.533$ ) and Egger's regression ( $p=0.730$ ) tests did not suggest the presence of publication bias. The results of “fail-safe N” test suggested that 174 missing studies would be required to make the observed significant result non-significant.

## DISCUSSION

In this meta-analysis of randomized placebo-controlled clinical trials, fenofibrate therapy was related to a significant reduction of apo C-III levels. Subanalyses revealed that this effect was observed even in those trials whose duration was less than 12 weeks and for doses of fenofibrate both higher and lower than 200 mg/day.

The reduction of apo C-III levels by fenofibrate therapy may contribute to a reduced risk of CAD achieved with fibrates therapy [42] [43] [44]; however, the mechanism(s) by which apo C-III increases CAD risk remain(s) unclear [7]. Loss of function mutations of the APO3 gene are associated with reduced triglyceride and VLDL levels [45], whereas genetic variations have linked APO3 to CAD risk [46]. Epidemiological studies have found an association between increased apo C-III and CAD that correlated with elevated triglyceride levels [47] [48] [49] [7]. It has been shown that elevated triglycerides and low HDL-cholesterol are not only associated

1  
2  
3 with macrovascular atherosclerotic changes such as CAD, but they are also risk factors for  
4  
5 microvascular disease in type 2 diabetes mellitus [42]. Indeed, in addition to the association with  
6  
7 elevated triglyceride-rich particles such as VLDL number and size, increased apo C-III levels  
8  
9 were also related to increased IDL particles numbers and a shift to more atherogenic small dense  
10  
11 LDL particles [7] [20]. Small dense LDL exerts atherogenic properties and has been linked to  
12  
13 increased cardiovascular risk as well as to the presence of metabolic disorders including obesity,  
14  
15 metabolic syndrome and type 2 diabetes [50] [51] [52]. Some speculate that it is quite unlikely  
16  
17 that elevated triglycerides *per se* might be associated with an increased risk of CAD. However,  
18  
19 triglyceride-rich particles such as VLDL and IDL could accumulate in the intima, and can be  
20  
21 further catabolised and ingested by macrophages to form foam cells, resulting in progression of  
22  
23 the atherosclerotic lesion [53]. Apo C-III may therefore be seen as a therapeutic target to reduce  
24  
25 CAD and anti-sense RNA inhibition has shown dramatic decreases in triglyceride levels [4] [5].  
26  
27  
28  
29  
30  
31

32 In the EPIC study, mediation analysis showed that a large part of the increased CAD risk  
33  
34 associated with apo C-III was attributable to the triglyceride-rich remnant particle levels [7]. This  
35  
36 fits well with the mechanism proposed above. It has been also proven that fenofibrate decreases  
37  
38 triglyceride-rich remnant particles [54, 55]. However, it was also shown that apo C-III was  
39  
40 associated with an increased C-reactive protein, a marker of inflammation that may represent an  
41  
42 independent predictor of increased CAD risk [56]. This finding may also reflect the LPL-  
43  
44 independent mechanism of increased CAD risk by apo C-III.  
45  
46  
47  
48

49 The present meta-analysis suggested that the effect of apoC-III lowering was relatively rapid as  
50  
51 it was observed within 12 weeks, thus indicating the early potential benefit of fibrate therapy.  
52  
53

1  
2  
3 However, no data exist that relate triglycerides reduction and remnant particles changes induced  
4  
5 by apoC-III. Of note, the reduction of apoC-III levels was also observed with fenofibrate doses <  
6  
7 200 mg/day, but it is unclear whether a reduction in apoC-III may occur even if in the absence of  
8  
9 a therapeutic decrease in triglyceride levels.  
10  
11

12  
13 The main limitation of the present meta-analysis is that several trials were characterized by a  
14  
15 small population size and a limited number of individuals. However, the pooled population  
16  
17 analyzed was sufficiently robust due to other studies that provided a large population size. In  
18  
19 addition, included studies did not define elevated plasma apo C-III levels among the inclusion  
20  
21 criteria and hence future trials specifically defined in populations with hyperapolipoproteinemia  
22  
23 C-III might be interesting.  
24  
25

## 26 27 28 **Conclusion**

29  
30 The results of the present meta-analysis showed that fenofibrate treatment significantly decreases  
31  
32 apoC-III levels, even with short-term treatment and doses < 200mg daily.  
33  
34  
35  
36  
37  
38  
39  
40  
41  
42  
43  
44  
45  
46  
47  
48  
49  
50  
51  
52  
53

1  
2  
3  
4 **Funding.** This research did not receive any specific grant from funding agencies in the public,  
5 commercial, or not-for-profit sectors.  
6  
7  
8  
9

10 **Conflict of interest.** NK has given talks, attended conferences and participated in trials  
11 sponsored by Amgen, Angelini, Astra Zeneca, Boehringer Ingelheim, Elpen, MSD, Novartis,  
12 NovoNordisk, Sanofi and WinMedica. MB has served on speaker's bureau and as an advisory  
13 board member for Amgen, Sanofi-Aventis and Lilly. Dr. Majeed is the Founder & Chairman of  
14 Sabinsa Corporation and Sami Labs Limited.  
15  
16  
17  
18  
19  
20  
21  
22  
23  
24

#### 25 **Author Contribution statement.**

26 AS and LESM contributed to the literature search, article screening, data acquisition and  
27 abstraction. AS contributed to the statistical analysis. SLA, AS and LESM contributed to  
28 interpretation of the results and drafting of the manuscript. NK, ZR, MB and MP contributed to  
29 critical revision of the manuscript. All authors approved the final version of the manuscript for  
30 submission.  
31  
32  
33  
34  
35  
36  
37

#### 38 **Data sharing**

39 All data is available on request to Professor Amirhossein Sahebkar  
40  
41  
42  
43  
44  
45  
46  
47  
48  
49  
50  
51  
52  
53  
54  
55  
56  
57  
58  
59  
60

## REFERENCES

- [1] N. Sarwar, J. Danesh, G. Eiriksdottir, G. Sigurdsson, N. Wareham, S. Bingham, S.M. Boekholdt, K.T. Khaw, V. Gudnason, Triglycerides and the risk of coronary heart disease: 10,158 incident cases among 262,525 participants in 29 Western prospective studies, *Circulation* 115(4) (2007) 450-8.
- [2] A.L. Catapano, I. Graham, G. De Backer, O. Wiklund, M.J. Chapman, H. Drexel, A.W. Hoes, C.S. Jennings, U. Landmesser, T.R. Pedersen, Z. Reiner, G. Riccardi, M.R. Taskinen, L. Tokgozoglu, W.M. Verschuren, C. Vlachopoulos, D.A. Wood, J.L. Zamorano, 2016 ESC/EAS Guidelines for the Management of Dyslipidaemias, *European heart journal* 37(39) (2016) 2999-3058.
- [3] Z. Reiner, Hypertriglyceridaemia and risk of coronary artery disease, *Nature reviews. Cardiology* 14(7) (2017) 401-411.
- [4] D. Gaudet, D. Brisson, K. Tremblay, V.J. Alexander, W. Singleton, S.G. Hughes, R.S. Geary, B.F. Baker, M.J. Graham, R.M. Crooke, J.L. Witztum, Targeting APOC3 in the familial chylomicronemia syndrome, *The New England journal of medicine* 371(23) (2014) 2200-6.
- [5] D. Gaudet, V.J. Alexander, B.F. Baker, D. Brisson, K. Tremblay, W. Singleton, R.S. Geary, S.G. Hughes, N.J. Viney, M.J. Graham, R.M. Crooke, J.L. Witztum, J.D. Brunzell, J.J. Kastelein, Antisense Inhibition of Apolipoprotein C-III in Patients with Hypertriglyceridemia, *The New England journal of medicine* 373(5) (2015) 438-47.
- [6] C.O. Mendivil, C. Zheng, J. Furtado, J. Lel, F.M. Sacks, Metabolism of very-low-density lipoprotein and low-density lipoprotein containing apolipoprotein C-III and not other small apolipoproteins, *Arteriosclerosis, thrombosis, and vascular biology* 30(2) (2010) 239-45.
- [7] J.C. van Capelleveen, S.J. Bernelot Moens, X. Yang, J.J.P. Kastelein, N.J. Wareham, A.H. Zwinderman, E.S.G. Stroes, J.L. Witztum, G.K. Hovingh, K.T. Khaw, S.M. Boekholdt, S. Tsimikas, Apolipoprotein C-III Levels and Incident Coronary Artery Disease Risk: The EPIC-Norfolk Prospective Population Study, *Arteriosclerosis, thrombosis, and vascular biology* 37(6) (2017) 1206-1212.
- [8] C. Zheng, Updates on apolipoprotein CIII: fulfilling promise as a therapeutic target for hypertriglyceridemia and cardiovascular disease, *Current opinion in lipidology* 25(1) (2014) 35-9.
- [9] A. Shah, D.J. Rader, J.S. Millar, The effect of PPAR-alpha agonism on apolipoprotein metabolism in humans, *Atherosclerosis* 210(1) (2010) 35-40.
- [10] J.C. Fruchart, F.M. Sacks, M.P. Hermans, G. Assmann, W.V. Brown, R. Ceska, M.J. Chapman, P.M. Dodson, P. Fioretto, H.N. Ginsberg, T. Kadowaki, J.M. Lablanche, N. Marx, J. Plutzky, Z. Reiner, R.S. Rosenson, B. Staels, J.K. Stock, R. Sy, C. Wanner, A. Zambon, P. Zimmet, The Residual Risk Reduction Initiative: a call to action to reduce residual vascular risk in dyslipidaemic patient, *Diabetes & vascular disease research* 5(4) (2008) 319-35.
- [11] M.J. Chapman, H.N. Ginsberg, P. Amarenco, F. Andreotti, J. Boren, A.L. Catapano, O.S. Descamps, E. Fisher, P.T. Kovanen, J.A. Kuivenhoven, P. Lesnik, L. Masana, B.G. Nordestgaard, K.K. Ray, Z. Reiner, M.R. Taskinen, L. Tokgozoglu, A. Tybjaerg-Hansen, G.F. Watts, Triglyceride-rich lipoproteins and high-density lipoprotein cholesterol in patients at high risk of cardiovascular disease: evidence and guidance for management, *European heart journal* 32(11) (2011) 1345-61.
- [12] G. Derosa, P. Maffioli, A. Sahebkar, Plasma uric acid concentrations are reduced by fenofibrate: A systematic review and meta-analysis of randomized placebo-controlled trials, *Pharmacological research* 102 (2015) 63-70.
- [13] A. Sahebkar, R. Giua, C. Pedone, K.K. Ray, A.J. Vallejo-Vaz, L. Costanzo, Fibrate therapy and flow-mediated dilation: A systematic review and meta-analysis of randomized placebo-controlled trials, *Pharmacological research* 111 (2016) 163-179.

- 1  
2  
3 [14] A. Sahebkar, A. Hernandez-Aguilera, D. Abello, E. Sancho, J. Camps, J. Joven, Systematic review and  
4 meta-analysis deciphering the impact of fibrates on paraoxonase-1 status, *Metabolism: clinical and*  
5 *experimental* 65(5) (2016) 609-22.
- 6 [15] A. Sahebkar, M.C. Serban, D.P. Mikhailidis, P.P. Toth, P. Muntner, S. Ursoniu, S. Mosterou, S.  
7 Glasser, S.S. Martin, S.R. Jones, M. Rizzo, J. Rysz, A.D. Sniderman, M.J. Pencina, M. Banach, *Lipid, G.*  
8 *Blood Pressure Meta-analysis Collaboration*, Head-to-head comparison of statins versus fibrates in  
9 reducing plasma fibrinogen concentrations: A systematic review and meta-analysis, *Pharmacological*  
10 *research* 103 (2016) 236-52.
- 11 [16] A. Sahebkar, L.E. Simental-Mendia, G.F. Watts, J. Golledge, Impact of fibrate therapy on plasma  
12 plasminogen activator inhibitor-1: a systematic review and meta-analysis of randomized controlled  
13 trials, *Atherosclerosis* 240(1) (2015) 284-96.
- 14 [17] A. Sahebkar, L.E. Simental-Mendia, G.F. Watts, M.C. Serban, M. Banach, *Lipid, G. Blood Pressure*  
15 *Meta-analysis Collaboration*, Comparison of the effects of fibrates versus statins on plasma  
16 lipoprotein(a) concentrations: a systematic review and meta-analysis of head-to-head randomized  
17 controlled trials, *BMC medicine* 15(1) (2017) 22.
- 18 [18] A. Sahebkar, G.F. Watts, Fibrate therapy and circulating adiponectin concentrations: a systematic  
19 review and meta-analysis of randomized placebo-controlled trials, *Atherosclerosis* 230(1) (2013) 110-20.
- 20 [19] M. Farnier, Update on the clinical utility of fenofibrate in mixed dyslipidemias: mechanisms of  
21 action and rational prescribing, *Vascular health and risk management* 4(5) (2008) 991-1000.
- 22 [20] N. Katsiki, D. Nikolic, G. Montalto, M. Banach, D.P. Mikhailidis, M. Rizzo, The role of fibrate  
23 treatment in dyslipidemia: an overview, *Current pharmaceutical design* 19(17) (2013) 3124-31.
- 24 [21] M. Vrablik, R. Ceska, Treatment of hypertriglyceridemia: a review of current options, *Physiological*  
25 *research* 64 Suppl 3 (2015) S331-40.
- 26 [22] M. Mansour, The roles of peroxisome proliferator-activated receptors in the metabolic syndrome,  
27 *Progress in molecular biology and translational science* 121 (2014) 217-66.
- 28 [23] S. Kersten, Peroxisome proliferator activated receptors and lipoprotein metabolism, *PPAR research*  
29 2008 (2008) 132960.
- 30 [24] C. Serban, A. Sahebkar, S. Ursoniu, D.P. Mikhailidis, M. Rizzo, G.Y. Lip, G. Kees Hovingh, J.J.  
31 Kastelein, L. Kalinowski, J. Rysz, M. Banach, A systematic review and meta-analysis of the effect of  
32 statins on plasma asymmetric dimethylarginine concentrations, *Scientific reports* 5 (2015) 9902.
- 33 [25] D. Moher, A. Liberati, J. Tetzlaff, D.G. Altman, Preferred reporting items for systematic reviews and  
34 meta-analyses: the PRISMA statement, *BMJ (Clinical research ed.)* 339 (2009) b2535.
- 35 [26] G.S. Higgins JPT, eds., *Cochrane Handbook for Systematic Reviews of Interventions.* , London, 2009.
- 36 [27] A. Sahebkar, Does PPARgamma2 gene Pro12Ala polymorphism affect nonalcoholic fatty liver  
37 disease risk? Evidence from a meta-analysis, *DNA and cell biology* 32(4) (2013) 188-98.
- 38 [28] A. Sahebkar, A.F.G. Cicero, L.E. Simental-Mendia, B.B. Aggarwal, S.C. Gupta, Curcumin  
39 downregulates human tumor necrosis factor-alpha levels: A systematic review and meta-analysis  
40 of randomized controlled trials, *Pharmacological research* 107 (2016) 234-242.
- 41 [29] S. Duval, R. Tweedie, Trim and fill: A simple funnel-plot-based method of testing and adjusting for  
42 publication bias in meta-analysis, *Biometrics* 56(2) (2000) 455-63.
- 43 [30] R. Belfort, R. Berria, J. Cornell, K. Cusi, Fenofibrate reduces systemic inflammation markers  
44 independent of its effects on lipid and glucose metabolism in patients with the metabolic syndrome, *The*  
45 *Journal of clinical endocrinology and metabolism* 95(2) (2010) 829-36.
- 46 [31] D.C. Chan, S.J. Hamilton, K.A. Rye, G.T. Chew, A.J. Jenkins, G. Lambert, G.F. Watts, Fenofibrate  
47 concomitantly decreases serum proprotein convertase subtilisin/kexin type 9 and very-low-density  
48  
49  
50  
51  
52  
53  
54  
55  
56  
57  
58  
59  
60

- lipoprotein particle concentrations in statin-treated type 2 diabetic patients, *Diabetes, obesity & metabolism* 12(9) (2010) 752-6.
- [32] M.H. Davidson, H.E. Bays, E. Stein, K.C. Maki, R.A. Shalwitz, R. Doyle, Effects of fenofibrate on atherogenic dyslipidemia in hypertriglyceridemic subjects, *Clinical cardiology* 29(6) (2006) 268-73.
- [33] S.J. Hamilton, G.T. Chew, T.M. Davis, G.F. Watts, Fenofibrate improves endothelial function in the brachial artery and forearm resistance arterioles of statin-treated Type 2 diabetic patients, *Clinical science (London, England : 1979)* 118(10) (2010) 607-15.
- [34] S. Ishibashi, S. Yamashita, H. Arai, E. Araki, K. Yokote, H. Suganami, J.C. Fruchart, T. Kodama, Effects of K-877, a novel selective PPARalpha modulator (SPPARMalpha), in dyslipidaemic patients: A randomized, double blind, active- and placebo-controlled, phase 2 trial, *Atherosclerosis* 249 (2016) 36-43.
- [35] T. Kazumi, T. Hirano, G. Yoshino, G. For The Fenofibrate Study, Effects of fenofibrate on albuminuria in patients with hypertriglyceridemia and/or hyperuricemia: a multicenter, randomized, double-blind, placebo-controlled, crossover study, *Current therapeutic research, clinical and experimental* 64(7) (2003) 434-46.
- [36] T. Kosoglou, P. Statkevich, J.C. Fruchart, L.J. Pember, L. Reyderman, D.L. Cutler, M. Guillaume, S.E. Maxwell, E.P. Veltri, Pharmacodynamic and pharmacokinetic interaction between fenofibrate and ezetimibe, *Current medical research and opinion* 20(8) (2004) 1197-207.
- [37] E.M. Ooi, T.W. Ng, G.F. Watts, D.C. Chan, P.H. Barrett, Effect of fenofibrate and atorvastatin on VLDL apoE metabolism in men with the metabolic syndrome, *Journal of lipid research* 53(11) (2012) 2443-9.
- [38] J. Sasaki, K. Yamamoto, M. Ageta, Effects of fenofibrate on high-density lipoprotein particle size in patients with hyperlipidemia: a randomized, double-blind, placebo-controlled, multicenter, crossover study, *Clinical therapeutics* 24(10) (2002) 1614-26.
- [39] G.L. Vega, N.B. Cater, D.R. Hadizadeh, 3rd, S. Meguro, S.M. Grundy, Free fatty acid metabolism during fenofibrate treatment of the metabolic syndrome, *Clinical pharmacology and therapeutics* 74(3) (2003) 236-44.
- [40] J.A. Wagner, P.J. Larson, S. Weiss, J.L. Miller, T.W. Doebber, M.S. Wu, D.E. Moller, K.M. Gottesdiener, Individual and combined effects of peroxisome proliferator-activated receptor and {gamma} agonists, fenofibrate and rosiglitazone, on biomarkers of lipid and glucose metabolism in healthy nondiabetic volunteers, *Journal of clinical pharmacology* 45(5) (2005) 504-13.
- [41] A. Grey, M. Bolland, G. Gamble, D. Wattie, A. Horne, J. Davidson, I.R. Reid, The peroxisome proliferator-activated receptor-gamma agonist rosiglitazone decreases bone formation and bone mineral density in healthy postmenopausal women: a randomized, controlled trial, *The Journal of clinical endocrinology and metabolism* 92(4) (2007) 1305-10.
- [42] A. Keech, R.J. Simes, P. Barter, J. Best, R. Scott, M.R. Taskinen, P. Forder, A. Pillai, T. Davis, P. Glasziou, P. Drury, Y.A. Kesaniemi, D. Sullivan, D. Hunt, P. Colman, M. d'Emden, M. Whiting, C. Ehnholm, M. Laakso, Effects of long-term fenofibrate therapy on cardiovascular events in 9795 people with type 2 diabetes mellitus (the FIELD study): randomised controlled trial, *Lancet (London, England)* 366(9500) (2005) 1849-61.
- [43] M. Lee, J.L. Saver, A. Towfighi, J. Chow, B. Ovbiagele, Efficacy of fibrates for cardiovascular risk reduction in persons with atherogenic dyslipidemia: a meta-analysis, *Atherosclerosis* 217(2) (2011) 492-8.
- [44] H.B. Rubins, S.J. Robins, D. Collins, D.B. Nelson, M.B. Elam, E.J. Schaefer, F.H. Faas, J.W. Anderson, Diabetes, plasma insulin, and cardiovascular disease: subgroup analysis from the Department of

- 1  
2  
3 Veterans Affairs high-density lipoprotein intervention trial (VA-HIT), *Archives of internal medicine*  
4 162(22) (2002) 2597-604.
- 5 [45] T.I. Pollin, C.M. Damcott, H. Shen, S.H. Ott, J. Shelton, R.B. Horenstein, W. Post, J.C. McLenithan, L.F.  
6 Bielak, P.A. Peyser, B.D. Mitchell, M. Miller, J.R. O'Connell, A.R. Shuldiner, A null mutation in human  
7 APOC3 confers a favorable plasma lipid profile and apparent cardioprotection, *Science (New York, N.Y.)*  
8 322(5908) (2008) 1702-5.
- 9 [46] J. Crosby, G.M. Peloso, P.L. Auer, D.R. Crosslin, N.O. Stitzel, L.A. Lange, Y. Lu, Z.Z. Tang, H. Zhang, G.  
10 Hindy, N. Masca, K. Stirrups, S. Kanoni, R. Do, G. Jun, Y. Hu, H.M. Kang, C. Xue, A. Goel, M. Farrall, S.  
11 Duga, P.A. Merlini, R. Asselta, D. Girelli, O. Olivieri, N. Martinelli, W. Yin, D. Reilly, E. Speliotes, C.S. Fox,  
12 K. Hveem, O.L. Holmen, M. Nikpay, D.N. Farlow, T.L. Assimes, N. Franceschini, J. Robinson, K.E. North,  
13 L.W. Martin, M. DePristo, N. Gupta, S.A. Escher, J.H. Jansson, N. Van Zuydam, C.N. Palmer, N. Wareham,  
14 W. Koch, T. Meitinger, A. Peters, W. Lieb, R. Erbel, I.R. Konig, J. Kruppa, F. Degenhardt, O. Gottesman,  
15 E.P. Bottinger, C.J. O'Donnell, B.M. Psaty, C.M. Ballantyne, G. Abecasis, J.M. Ordovas, O. Melander, H.  
16 Watkins, M. Orho-Melander, D. Ardissino, R.J. Loos, R. McPherson, C.J. Willer, J. Erdmann, A.S. Hall, N.J.  
17 Samani, P. Deloukas, H. Schunkert, J.G. Wilson, C. Kooperberg, S.S. Rich, R.P. Tracy, D.Y. Lin, D. Altshuler,  
18 S. Gabriel, D.A. Nickerson, G.P. Jarvik, L.A. Cupples, A.P. Reiner, E. Boerwinkle, S. Kathiresan, Loss-of-  
19 function mutations in APOC3, triglycerides, and coronary disease, *The New England journal of medicine*  
20 371(1) (2014) 22-31.
- 21 [47] M.C. Wyler von Ballmoos, B. Haring, F.M. Sacks, The risk of cardiovascular events with increased  
22 apolipoprotein CIII: A systematic review and meta-analysis, *Journal of clinical lipidology* 9(4) (2015) 498-  
23 510.
- 24 [48] P.G. Scheffer, T. Teerlink, J.M. Dekker, G. Bos, G. Nijpels, M. Diamant, P.J. Kostense, C.D. Stehouwer,  
25 R.J. Heine, Increased plasma apolipoprotein C-III concentration independently predicts cardiovascular  
26 mortality: the Hoorn Study, *Clinical chemistry* 54(8) (2008) 1325-30.
- 27 [49] R. Pechlaner, S. Tsimikas, X. Yin, P. Willeit, F. Baig, P. Santer, F. Oberhollenzer, G. Egger, J.L.  
28 Witztum, V.J. Alexander, J. Willeit, S. Kiechl, M. Mayr, Very-Low-Density Lipoprotein-Associated  
29 Apolipoproteins Predict Cardiovascular Events and Are Lowered by Inhibition of APOC-III, *Journal of the*  
30 *American College of Cardiology* 69(7) (2017) 789-800.
- 31 [50] S. Oravec, A. Dukat, P. Gavornik, M. Kucera, K. Gruber, L. Gaspar, M. Rizzo, P.P. Toth, D.P.  
32 Mikhailidis, M. Banach, Atherogenic versus non-atherogenic lipoprotein profiles in healthy individuals. is  
33 there a need to change our approach to diagnosing dyslipidemia?, *Current medicinal chemistry* 21(25)  
34 (2014) 2892-901.
- 35 [51] D.P. Mikhailidis, M. Elisaf, M. Rizzo, K. Berneis, B. Griffin, A. Zambon, V. Athyros, J. de Graaf, W.  
36 Marz, K.G. Parhofer, G.B. Rini, G.A. Spinas, G.H. Tomkin, A.D. Tselepis, A.S. Wierzbicki, K. Winkler, M.  
37 Florentin, E. Liberopoulos, "European panel on low density lipoprotein (LDL) subclasses": a statement on  
38 the pathophysiology, atherogenicity and clinical significance of LDL subclasses: executive summary,  
39 *Current vascular pharmacology* 9(5) (2011) 531-2.
- 40 [52] N. Katsiki, N. Tentolouris, D.P. Mikhailidis, Dyslipidaemia in type 2 diabetes mellitus: bad for the  
41 heart, *Current opinion in cardiology* 32(4) (2017) 422-429.
- 42 [53] P. Lindqvist, A.M. Ostlund-Lindqvist, J.L. Witztum, D. Steinberg, J.A. Little, The role of lipoprotein  
43 lipase in the metabolism of triglyceride-rich lipoproteins by macrophages, *The Journal of biological*  
44 *chemistry* 258(15) (1983) 9086-92.
- 45 [54] R. Ferrari, C. Aguiar, E. Alegria, R.C. Bonadonna, F. Cosentino, M. Elisaf, M. Farnier, J. Ferrieres, P.P.  
46 Filardi, N. Hancu, M. Kayikcioglu, E.S.A. Mello, J. Millan, Z. Reiner, L. Tokgozoglu, P. Valensi, M. Viigimaa,  
47 M. Vrablik, A. Zambon, J.L. Zamorano, A.L. Catapano, Current practice in identifying and treating



1  
2  
3 cardiovascular risk, with a focus on residual risk associated with atherogenic dyslipidaemia, European  
4 heart journal supplements : journal of the European Society of Cardiology 18(Suppl C) (2016) C2-c12.  
5 [55] C. Aguiar, E. Alegria, R.C. Bonadonna, A.L. Catapano, F. Cosentino, M. Elisaf, M. Farnier, J. Ferrieres,  
6 P.P. Filardi, N. Hancu, M. Kayikcioglu, E.S.A. Mello, J. Millan, Z. Reiner, L. Tokgozoglu, P. Valensi, M.  
7 Viigimaa, M. Vrablik, A. Zambon, J.L. Zamorano, R. Ferrari, A review of the evidence on reducing  
8 macrovascular risk in patients with atherogenic dyslipidaemia: A report from an expert consensus  
9 meeting on the role of fenofibrate-statin combination therapy, Atherosclerosis. Supplements 19 (2015)  
10 1-12.  
11 [56] P.M. Ridker, E. Danielson, F.A. Fonseca, J. Genest, A.M. Gotto, Jr., J.J. Kastelein, W. Koenig, P. Libby,  
12 A.J. Lorenzatti, J.G. MacFadyen, B.G. Nordestgaard, J. Shepherd, J.T. Willerson, R.J. Glynn, Rosuvastatin  
13 to prevent vascular events in men and women with elevated C-reactive protein, The New England  
14 journal of medicine 359(21) (2008) 2195-207.  
15  
16  
17  
18  
19  
20  
21  
22  
23  
24  
25  
26  
27  
28  
29  
30  
31  
32  
33  
34  
35  
36  
37  
38  
39  
40  
41  
42  
43  
44  
45  
46  
47  
48  
49  
50  
51  
52  
53  
54  
55  
56  
57  
58  
59  
60

## FIGURE LEGENDS

**Figure 1.** Flow chart of the number of studies identified and included into the meta-analysis.

**Figure 2.** Forest plot displaying weighted mean difference and 95% confidence intervals for the effects of fenofibrate on circulating apolipoprotein C-III concentrations. The lower plot shows the results of leave-one-out sensitivity analysis.

**Figure 3.** Forest plot displaying weighted mean difference and 95% confidence intervals for the effects of different doses ( $< 200$  mg/day vs.  $\geq 200$  mg/day) and durations ( $< 12$  weeks vs.  $\geq 12$  weeks) of treatment with fenofibrate on circulating apolipoprotein C-III concentrations.

**Figure 4.** Meta-regression bubble plots of the association between mean changes in plasma apolipoprotein C-III concentrations with baseline apolipoprotein C-III levels and percent change in circulating triglycerides levels. The size of each circle is inversely proportional to the variance of change.

**Figure 5.** Funnel plot detailing publication bias in the studies reporting the impact of fenofibrate on plasma apo C-III concentrations.

1  
2  
3  
4  
5  
6  
7  
8  
9  
10  
11  
12  
13  
14  
15  
16  
17  
18  
19  
20  
21  
22  
23  
24  
25  
26  
27  
28  
29  
30  
31  
32  
33  
34  
35  
36  
37  
38  
39  
40  
41  
42  
43  
44  
45  
46  
47

For peer review only

1  
2  
3  
4  
5  
6  
7  
8  
9  
10  
11  
12  
13  
14  
15  
16  
17  
18  
19  
20  
21  
22  
23  
24  
25  
26  
27  
28  
29  
30  
31  
32  
33  
34  
35  
36  
37  
38  
39  
40  
41  
42  
43  
44  
45  
46  
47  
48  
49  
50  
51  
52  
53  
54  
55  
56  
57  
58  
59  
60

For peer review only

1  
2  
3  
4  
5  
6  
7  
8  
9  
10  
11  
12  
13  
14  
15  
16  
17  
18  
19  
20  
21  
22  
23  
24  
25  
26  
27  
28  
29  
30  
31  
32  
33  
34  
35  
36  
37  
38  
39  
40  
41  
42  
43  
44  
45  
46  
47  
48  
49  
50  
51  
52  
53  
54  
55  
56  
57  
58  
59  
60

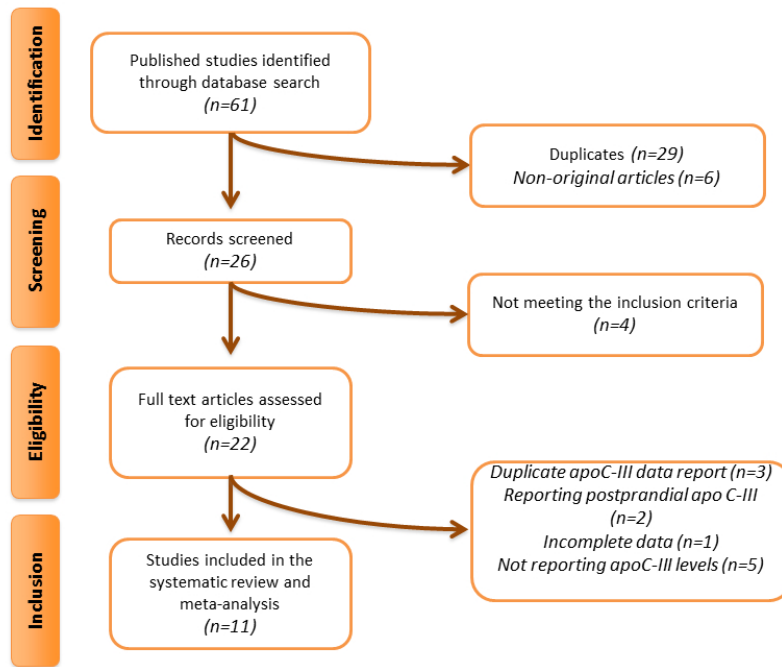

Figure 1. Flow chart of the number of studies identified and included into the meta-analysis.

81x60mm (300 x 300 DPI)

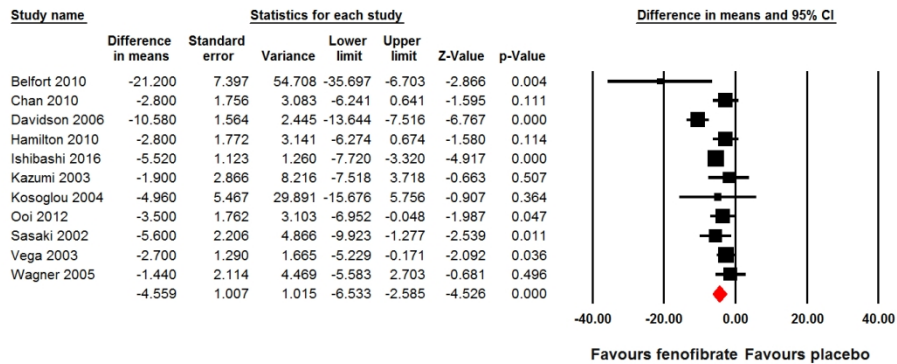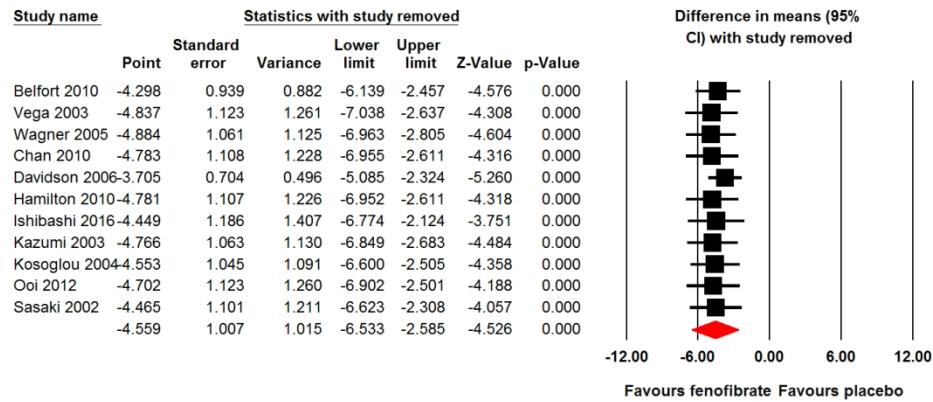

Figure 2. Forest plot displaying weighted mean difference and 95% confidence intervals for the effects of fenofibrate on circulating apolipoprotein C-III concentrations. The lower plot shows the results of leave-one-out sensitivity analysis.

128x118mm (300 x 300 DPI)

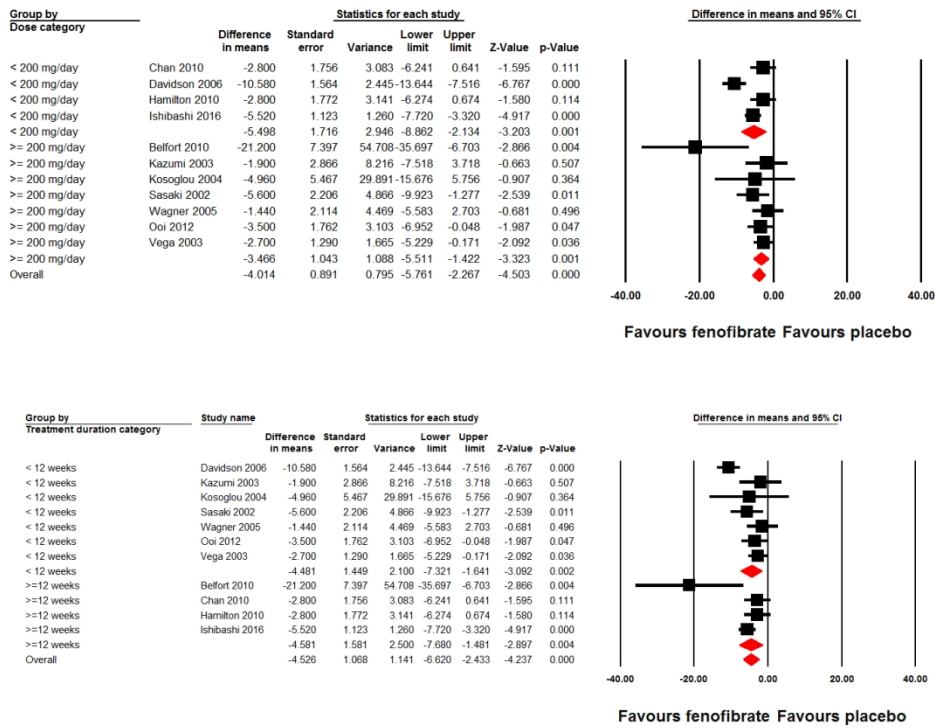

Figure 3. Forest plot displaying weighted mean difference and 95% confidence intervals for the effects of different doses (< 200 mg/day vs. ≥ 200 mg/day) and durations (< 12 weeks vs. ≥ 12 weeks) of treatment with fenofibrate on circulating apolipoprotein C-III concentrations.

124x100mm (300 x 300 DPI)

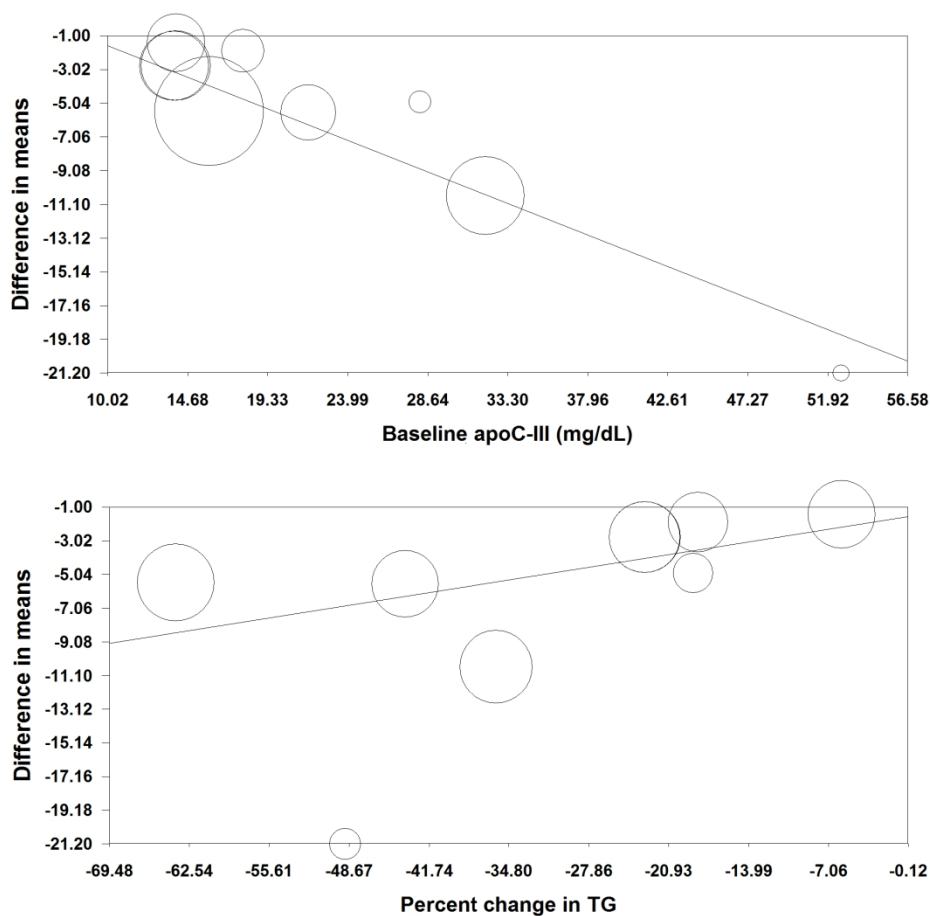

Figure 4. Meta-regression bubble plots of the association between mean changes in plasma apolipoprotein C-III concentrations with baseline apolipoprotein C-III levels and percent change in circulating triglycerides levels. The size of each circle is inversely proportional to the variance of change.

180x174mm (300 x 300 DPI)



1  
2  
3  
4  
5  
6  
7  
8  
9  
10  
11  
12  
13  
14  
15  
16  
17  
18  
19  
20  
21  
22  
23  
24  
25  
26  
27  
28  
29  
30  
31  
32  
33  
34  
35  
36  
37  
38  
39  
40  
41  
42  
43  
44  
45  
46  
47  
48  
49  
50  
51  
52  
53  
54  
55  
56  
57  
58  
59  
60

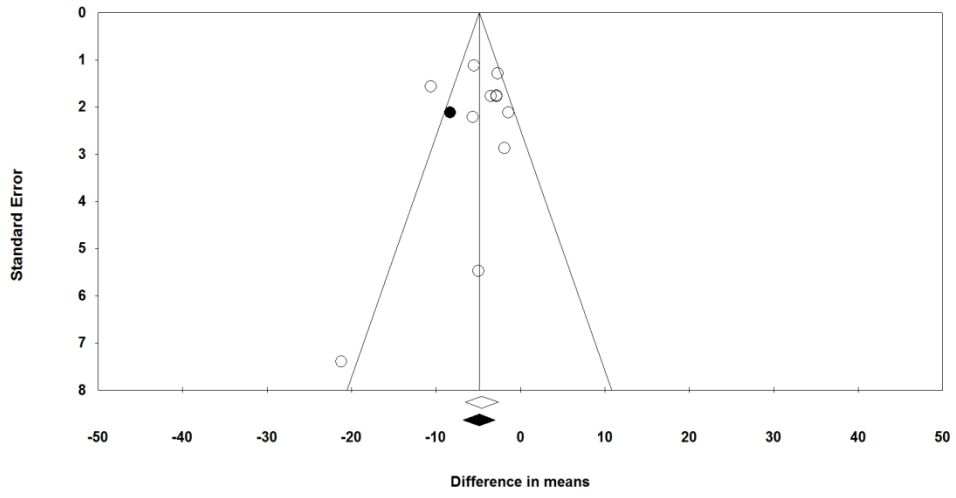

Figure 5. Funnel plot detailing publication bias in the studies reporting the impact of fenofibrate on plasma apo C-III concentrations.

149x78mm (300 x 300 DPI)

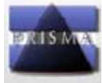

# PRISMA 2009 Checklist

| Section/topic                      | #  | Checklist item                                                                                                                                                                                                                                                                                              | Reported on page # |
|------------------------------------|----|-------------------------------------------------------------------------------------------------------------------------------------------------------------------------------------------------------------------------------------------------------------------------------------------------------------|--------------------|
| <b>TITLE</b>                       |    |                                                                                                                                                                                                                                                                                                             |                    |
| Title                              | 1  | Identify the report as a systematic review, meta-analysis, or both.                                                                                                                                                                                                                                         | 1                  |
| <b>ABSTRACT</b>                    |    |                                                                                                                                                                                                                                                                                                             |                    |
| Structured summary                 | 2  | Provide a structured summary including, as applicable: background; objectives; data sources; study eligibility criteria, participants, and interventions; study appraisal and synthesis methods; results; limitations; conclusions and implications of key findings; systematic review registration number. | 2                  |
| <b>INTRODUCTION</b>                |    |                                                                                                                                                                                                                                                                                                             |                    |
| Rationale                          | 3  | Describe the rationale for the review in the context of what is already known.                                                                                                                                                                                                                              | 4                  |
| Objectives                         | 4  | Provide an explicit statement of questions being addressed with reference to participants, interventions, comparisons, outcomes, and study design (PICOS).                                                                                                                                                  | 4                  |
| <b>METHODS</b>                     |    |                                                                                                                                                                                                                                                                                                             |                    |
| Protocol and registration          | 5  | Indicate if a review protocol exists, if and where it can be accessed (e.g., Web address), and, if available, provide registration information including registration number.                                                                                                                               | N/A                |
| Eligibility criteria               | 6  | Specify study characteristics (e.g., PICOS, length of follow-up) and report characteristics (e.g., years considered, language, publication status) used as criteria for eligibility, giving rationale.                                                                                                      | 5                  |
| Information sources                | 7  | Describe all information sources (e.g., databases with dates of coverage, contact with study authors to identify additional studies) in the search and date last searched.                                                                                                                                  | 5                  |
| Search                             | 8  | Present full electronic search strategy for at least one database, including any limits used, such that it could be repeated.                                                                                                                                                                               | 5                  |
| Study selection                    | 9  | State the process for selecting studies (i.e., screening, eligibility, included in systematic review, and, if applicable, included in the meta-analysis).                                                                                                                                                   | 5                  |
| Data collection process            | 10 | Describe method of data extraction from reports (e.g., piloted forms, independently, in duplicate) and any processes for obtaining and confirming data from investigators.                                                                                                                                  | 6                  |
| Data items                         | 11 | List and define all variables for which data were sought (e.g., PICOS, funding sources) and any assumptions and simplifications made.                                                                                                                                                                       | 6                  |
| Risk of bias in individual studies | 12 | Describe methods used for assessing risk of bias of individual studies (including specification of whether this was done at the study or outcome level), and how this information is to be used in any data synthesis.                                                                                      | 7                  |
| Summary measures                   | 13 | State the principal summary measures (e.g., risk ratio, difference in means).                                                                                                                                                                                                                               | 6                  |
| Synthesis of results               | 14 | Describe the methods of handling data and combining results of studies, if done, including measures of consistency (e.g., $I^2$ ) for each meta-analysis.                                                                                                                                                   | 6                  |

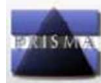

# PRISMA 2009 Checklist

Page 1 of 2

| Section/topic                 | #  | Checklist item                                                                                                                                                                                           | Reported on page #      |
|-------------------------------|----|----------------------------------------------------------------------------------------------------------------------------------------------------------------------------------------------------------|-------------------------|
| Risk of bias across studies   | 15 | Specify any assessment of risk of bias that may affect the cumulative evidence (e.g., publication bias, selective reporting within studies).                                                             | 11                      |
| Additional analyses           | 16 | Describe methods of additional analyses (e.g., sensitivity or subgroup analyses, meta-regression), if done, indicating which were pre-specified.                                                         | 7                       |
| <b>RESULTS</b>                |    |                                                                                                                                                                                                          |                         |
| Study selection               | 17 | Give numbers of studies screened, assessed for eligibility, and included in the review, with reasons for exclusions at each stage, ideally with a flow diagram.                                          | 8                       |
| Study characteristics         | 18 | For each study, present characteristics for which data were extracted (e.g., study size, PICOS, follow-up period) and provide the citations.                                                             | 8                       |
| Risk of bias within studies   | 19 | Present data on risk of bias of each study and, if available, any outcome level assessment (see item 12).                                                                                                | Page 11 and Table 2     |
| Results of individual studies | 20 | For all outcomes considered (benefits or harms), present, for each study: (a) simple summary data for each intervention group (b) effect estimates and confidence intervals, ideally with a forest plot. | Table 1, Figure 2 and 3 |
| Synthesis of results          | 21 | Present results of each meta-analysis done, including confidence intervals and measures of consistency.                                                                                                  | Figure 2 and 3          |
| Risk of bias across studies   | 22 | Present results of any assessment of risk of bias across studies (see Item 15).                                                                                                                          | 14                      |
| Additional analysis           | 23 | Give results of additional analyses, if done (e.g., sensitivity or subgroup analyses, meta-regression [see Item 16]).                                                                                    | 13 and Figure 4         |
| <b>DISCUSSION</b>             |    |                                                                                                                                                                                                          |                         |
| Summary of evidence           | 24 | Summarize the main findings including the strength of evidence for each main outcome; consider their relevance to key groups (e.g., healthcare providers, users, and policy makers).                     | 14                      |
| Limitations                   | 25 | Discuss limitations at study and outcome level (e.g., risk of bias), and at review-level (e.g., incomplete retrieval of identified research, reporting bias).                                            | 14                      |
| Conclusions                   | 26 | Provide a general interpretation of the results in the context of other evidence, and implications for future research.                                                                                  | 14                      |
| <b>FUNDING</b>                |    |                                                                                                                                                                                                          |                         |
| Funding                       | 27 | Describe sources of funding for the systematic review and other support (e.g., supply of data); role of funders for the systematic review.                                                               | 17                      |

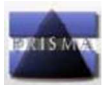

# PRISMA 2009 Checklist

From: Moher D, Liberati A, Tetzlaff J, Altman DG, The PRISMA Group (2009). Preferred Reporting Items for Systematic Reviews and Meta-Analyses: The PRISMA Statement. PLoS Med 6(7): e1000097. doi:10.1371/journal.pmed1000097

For more information, visit: [www.prisma-statement.org](http://www.prisma-statement.org).

Page 2 of 2

For peer review only

# BMJ Open

## Effect of Fenofibrate on plasma apolipoprotein C-III levels: A Systematic Review and Meta-Analysis of Randomized Placebo-Controlled Trials

|                                 |                                                                                                                                                                                                                                                                                                                                                                                                                                  |
|---------------------------------|----------------------------------------------------------------------------------------------------------------------------------------------------------------------------------------------------------------------------------------------------------------------------------------------------------------------------------------------------------------------------------------------------------------------------------|
| Journal:                        | <i>BMJ Open</i>                                                                                                                                                                                                                                                                                                                                                                                                                  |
| Manuscript ID                   | bmjopen-2018-021508.R1                                                                                                                                                                                                                                                                                                                                                                                                           |
| Article Type:                   | Research                                                                                                                                                                                                                                                                                                                                                                                                                         |
| Date Submitted by the Author:   | 26-Jun-2018                                                                                                                                                                                                                                                                                                                                                                                                                      |
| Complete List of Authors:       | Sahebkar , Amir; Mashhad University of Medical Sciences<br>Simental-Mendia, Luis; Biomedical Research Unit, Mexican Social Security Institute<br>Katsiki, Niki; Aristotle University of Thessaloniki<br>Reiner, Zeljko; Univ Zagreb, Department of internal medicine<br>Banach, Maciej ; Department of Hypertension<br>Pirro, Matteo; University of Perugia<br>Atkin, Stephen; Weill Cornell Medical College in Qatar, Research; |
| <b>Primary Subject Heading</b>: | Cardiovascular medicine                                                                                                                                                                                                                                                                                                                                                                                                          |
| Secondary Subject Heading:      | Research methods                                                                                                                                                                                                                                                                                                                                                                                                                 |
| Keywords:                       | fenofibrate, fibrate, apolipoprotein C, meta-analysis                                                                                                                                                                                                                                                                                                                                                                            |
|                                 |                                                                                                                                                                                                                                                                                                                                                                                                                                  |

SCHOLARONE™  
Manuscripts

# Effect of Fenofibrate on plasma apolipoprotein C-III levels: A Systematic Review and Meta-Analysis of Randomized Placebo-Controlled Trials

**Short title.** Fenofibrate reduces plasma apoC-III

Amirhossein Sahebkar,<sup>1,2,3</sup> Luis E. Simental-Mendía,<sup>4</sup> Niki Katsiki,<sup>5</sup> Željko Reiner,<sup>6</sup> Maciej Banach,<sup>7,8</sup> Matteo Pirro,<sup>9</sup> Stephen L. Atkin<sup>10\*</sup>

<sup>1</sup>*Biotechnology Research Center, Pharmaceutical Technology Institute, Mashhad University of Medical Sciences, Mashhad, Iran*

<sup>2</sup>*Neurogenic Inflammation Research Center, Mashhad University of Medical Sciences, Mashhad, Iran*

<sup>3</sup>*School of Pharmacy, Mashhad University of Medical Sciences, Mashhad, Iran*

<sup>4</sup>*Biomedical Research Unit, Mexican Social Security Institute, Durango, Mexico*

<sup>5</sup>*Second Propedeutic Department of Internal Medicine, Medical School, Aristotle University of Thessaloniki, Hippocraton Hospital, Thessaloniki, Greece*

<sup>6</sup>*University Hospital Center Zagreb, Department of Internal medicine, Kišpatićeva 12, University of Zagreb, Croatia*

<sup>7</sup>*Department of Hypertension, WAM University Hospital in Lodz, Medical University of Lodz, Zeromskiego 113, Lodz, Poland*

<sup>8</sup>*Polish Mother's Memorial Hospital Research Institute (PMMHRI), Lodz, Poland*

<sup>9</sup>*Unit of Internal Medicine, Angiology and Arteriosclerosis Diseases, Department of Medicine, University of Perugia, Perugia, Italy*

<sup>10</sup>*Weill Cornell Medicine Qatar, Education City, PO Box 24144, Doha, Qatar*

**\*Corresponding author:** Stephen L Atkin. Weill Cornell Medicine Qatar, Education City, PO Box 24144, Doha, Qatar. Tel: +97455635807. Fax +97444928422. Email: sla2002@qatar-med.cornell.edu

**Key words:** Fenofibrate; fibrate; apoprotein C; triglyceride; meta-analysis.

## ABSTRACT

**Objectives.** This meta-analysis of randomized placebo-controlled clinical trials aimed to assess the effect of fenofibrate on apolipoprotein C-III (apo C-III), a key regulator of triglyceride metabolism.

**Materials and methods.** Randomized placebo-controlled trials investigating the impact of fenofibrate treatment on apo C-III levels were searched in PubMed-Medline, SCOPUS, Web of Science and Google Scholar databases from inception to August 18, 2017. Quantitative data synthesis was determined by a random-effects model and generic inverse variance method. Sensitivity analysis was conducted using the leave-one-out method. A weighted random-effects meta-regression was performed to evaluate glycaemic parameter confounders.

**Results.** Meta-analysis of 10 clinical trials involving 477 subjects showed fenofibrate therapy decreased apo C-III levels (weighted mean difference (WMD): -4.78 mg/dL, 95% confidence interval (CI): -6.95, -2.61,  $p < 0.001$ ;  $I^2$ : 66.87%). Subgroup analysis showed that fenofibrate reduced plasma apo C-III concentrations in subgroups of trials with treatment durations of either  $< 12$  weeks (WMD: -4.50 mg/dL,  $p = 0.001$ ) or  $\geq 12$  weeks (WMD: -4.73 mg/dL,  $p = 0.009$ ) and doses of fenofibrate  $< 200$  mg/day (WMD: -6.33 mg/dL,  $p < 0.001$ ) and  $> 200$  mg/day ( $p = 0.006$ ), with no significant difference between the subgroups.

**Conclusion.** This meta-analysis found that fenofibrate therapy significantly decreases apo C-III levels, an effect evident with both short term treatment and doses less than 200 mg/day.

**Keywords:** fenofibrate; glucose; apolipoprotein C-III; meta-analysis.

### Strengths and limitations

- This was the first systematic review to determine the effect of fenofibrate on plasma apo C-III.
- The strength of this study was the use of the meta-analysis that utilized the increased population size compared with individual studies that were small and, in some instances, underpowered to discern if fenofibrate had an effect on plasma apo C-III.
- The limitation was that the small number of trials, lack of studies in patients with hyperapolipoproteinemia C-III and lack of presenting gender-stratified results by individual studies.



## INTRODUCTION

Elevated triglycerides have been shown to be an independent marker of coronary artery disease (CAD) <sup>1 2 3</sup>. Apolipoprotein C-III (apo C-III) is a key regulator of triglyceride metabolism that mediates its effects through lipoprotein lipase (LPL) inhibition. However, indirect LPL-independent mechanisms are also present, shown by inhibition of ApoC-III messenger RNA and a reduction of apoC-III levels in patients with LPL deficiency <sup>4 5</sup>. Apo C-III also inhibits hepatic lipase activity that decreases the conversion of very-low-density lipoprotein (VLDL) to intermediate-density lipoprotein (IDL) and low-density lipoprotein (LDL) <sup>6</sup>. Recently, apo C-III was shown to be significantly associated with incident CAD in the EPIC-Norfolk prospective population study <sup>7</sup>. It has been suggested that apoC-III may exert atherogenic properties by both direct (via enhancing inflammation) and indirect (*via* promoting hypertriglyceridemia) mechanisms <sup>8</sup>.

Fibrates are a therapeutic class of drugs that are used primarily for the treatment of hypertriglyceridemia, but are also for combined dyslipidemias in which both triglycerides and LDL-cholesterol are elevated <sup>9 10 11</sup>. Fibrates also have several pleiotropic activities described recently <sup>12-18</sup>. Fenofibrate is the most commonly used fibrate that induces lipoprotein lipolysis, fatty acid uptake and increase high-density lipoprotein (HDL) production <sup>19 20</sup>, while reducing plasma triglyceride levels by 20-30% <sup>21</sup>. Mechanistically, fenofibrate activates peroxisome proliferator activated receptor alpha (PPAR $\alpha$ ) through modulation of genes expression related to fatty acid and lipoprotein metabolism <sup>22 23 24</sup>.

This meta-analysis of randomized placebo-controlled clinical trials using fenofibrate therapy aimed to determine its effect on apo C-III levels.

## METHODS

### Search Strategy

This study was designed according to the guidelines of the preferred reporting items for systematic reviews and meta-analysis (PRISMA) statement<sup>25</sup>. PubMed-Medline, Scopus and ISI Web of Knowledge databases were searched using the following search terms in titles and abstracts: fenofibrate AND (apoCIII OR apoC-III OR "apo CIII" OR "apo C-III" OR apoC3 OR "apo C3") AND (placebo OR placebo-controlled). The wild-card term “\*” was used to increase the sensitivity of the search strategy. An example of the search strategy employed in PubMed-Medline is shown in Supplementary File 1. The search was limited to articles published in English language. The literature was searched from inception to August 18, 2017.

### Study Selection

Original studies were included if they met the following inclusion criteria: (i) being a randomized placebo-controlled clinical trial with either parallel or cross-over design, (ii) investigating the impact of fenofibrate versus placebo on total circulating concentrations of apoC-III, and, (iii) presentation of sufficient information on apoC-III concentrations at baseline and at study end in both intervention and placebo groups or providing the net change values. Exclusion criteria were: (i) non-clinical studies, (ii) uncontrolled OR non-placebo-controlled studies, (iii) observational studies with case-control, cross-sectional or cohort design, (iv) reporting postprandial plasma apoC-III levels, and (v) lack of sufficient information on baseline or follow-up total circulating apoC-III levels.

## Data extraction

Eligible studies were reviewed and the following data were abstracted: 1) first author's name, 2) year of publication, 3) country where the study was performed, 4) study design, 5) number of participants in the statin and control groups, 6) fenofibrate dose, 7) duration of treatment, 8) age, gender and body mass index (BMI) of study participants, and 9) baseline and follow-up concentrations of plasma lipids, lipoproteins and apolipoproteins including apoC-III. When apoC-III data were incompletely reported, authors of the respective article were contacted to obtain missing information. Two authors (AS and LES) reviewed the papers and disagreements were resolved through discussion and consultation with a third author (SLA).

## Quality assessment

The quality of involved studies in this meta-analysis was evaluated using the Cochrane criteria. Risk of bias in the studies considered in this meta-analysis was evaluated according to the Cochrane instructions<sup>26</sup>.

## Quantitative Data Synthesis

Meta-analysis was conducted using Comprehensive Meta-Analysis (CMA) V2 software (Biostat, NJ). A random-effects model (using DerSimonian-Laird method) and the generic inverse variance weighting method were used to compensate for the heterogeneity of studies in terms of study design, treatment duration, and the characteristics of populations being studied. Standard deviations (SDs) of  $(SD_{\text{pre-treatment}})^2 + (SD_{\text{post-treatment}})^2 - (2R \times SD_{\text{pre-treatment}} \times SD_{\text{post-treatment}})]$ , assuming a correlation coefficient (R) = 0.5. Where standard error of the mean (SEM) was only reported, standard deviation (SD) was estimated using the following formula:  $SD = SEM \times \text{sqrt}$

1  
2  
3  
4 ( $n$ ), where  $n$  is the number of subjects. Heterogeneity was assessed quantitatively using Cochrane  
5  
6  $Q$  and  $I^2$  statistic. All apo C-III values were collated in mg/L. Effect sizes were expressed as  
7  
8 standardized mean difference (WMD) and 95% confidence interval (CI). In order to avoid the  
9  
10 double-counting problem in trials comparing multiple treatment arms versus a single control  
11  
12 group, the number of subjects in the control group were divided by the number of treatment  
13  
14 arms. In order to evaluate the influence of each study on the overall effect size, a sensitivity  
15  
16 analysis was conducted using the leave-one-out method (i.e., removing one study each time and  
17  
18 repeating the analysis)<sup>27 28</sup>.  
19  
20  
21

### 22 **Meta-regression**

23  
24 As potential confounders of treatment response, the duration of treatment and baseline plasma  
25  
26 apoC-III concentrations were entered into a random-effects meta-regression model to explore  
27  
28 their association with the estimated effect size on plasma apoC-III levels.  
29  
30  
31

### 32 **Publication bias**

33  
34 Evaluation of funnel plot, Begg's rank correlation and Egger's weighted regression tests were  
35  
36 performed to assess the presence of publication bias in the meta-analysis. When there was  
37  
38 evidence of funnel plot asymmetry, potentially missing studies were imputed using the "trim and  
39  
40 fill" method<sup>29</sup>. In case of a significant result, the number of potentially missing studies required  
41  
42 to make the  $p$ -value non-significant was estimated using the "fail-safe N" method as another  
43  
44 marker of publication bias.  
45  
46  
47  
48

### 49 **Patient and public involvement**

50  
51 No patients or public were involved in this study.  
52  
53

## RESULTS

Overall, 61 articles were found following multi-database search. After screening of titles and abstracts, 22 articles were assessed in full text. Of these 5 articles were excluded because of lack of reporting serum/plasma total apo C-III concentrations, 4 because of duplicate reporting of data from the same population, 2 because of reporting postprandial apo C-III levels, and 1 because of incomplete data on apo C-III levels. Therefore, 10 articles were found to be eligible for inclusion in the meta-analysis (**Figure 1**).

### Study characteristics

Data were pooled from 10 randomized placebo-controlled clinical trials comprising a total of 477 subjects, including 265 and 212 participants in the fenofibrate and placebo arms respectively (individuals of the cross-over trials were considered in the treatment and control groups)<sup>30-40</sup>. Clinical trials reported different doses of fenofibrate. The included studies were published between 2002<sup>38 34</sup> and 2016. Treatment duration ranged from 2 weeks<sup>36 40</sup> up to 12 weeks<sup>30 31 31 33 34</sup>. Study designs of included trials were parallel<sup>30 41 34 36</sup> and cross-over<sup>31 33 35 37 38 39 40</sup>. Selected studies enrolled subjects with metabolic syndrome<sup>30</sup>, type 2 diabetes<sup>31 33</sup>, hypertriglyceridemia<sup>32 35 38</sup>, dyslipidemia<sup>34 36</sup> and nondiabetic subjects<sup>40</sup>. Characteristics of the included clinical trials are presented in **Table 1**.

**Table 1.** Demographic characteristics of the included studies.

| Author | Study design | Target Population | Treatment duration | Total population | Study group | Age, years | Female/male (n) | BMI (kg/ | Total cholesterol | LDL cholesterol | HDL cholesterol | Triglycerides | ApoC-III |
|--------|--------------|-------------------|--------------------|------------------|-------------|------------|-----------------|----------|-------------------|-----------------|-----------------|---------------|----------|
|--------|--------------|-------------------|--------------------|------------------|-------------|------------|-----------------|----------|-------------------|-----------------|-----------------|---------------|----------|

|                         | on                                                       | (n)      | ps                   | m <sup>2</sup> | (mg/dl)                | (mg/dl)  | (mg/dl) | (mg/dl)  | (mg/dl)    | (mg/dl)    |           |           |           |
|-------------------------|----------------------------------------------------------|----------|----------------------|----------------|------------------------|----------|---------|----------|------------|------------|-----------|-----------|-----------|
| Belfort et al. (2010)   | Randomized, double-blind, placebo-controlled             | 12 weeks | Metabolic syndrome   | 16             | Fenofibrate 200 mg/day | 46±8     | 5/11    | 31.6±4   | 228±72     | 109±56     | 34±8      | 500±28    | 52.7±23.2 |
|                         |                                                          |          |                      | 9              | Placebo                | 46±9     | 3/6     | 31.5±3   | 219±33     | 117±30     | 34±9      | 343±12    | 35.5±12.3 |
| Chan et al. (2010)      | Randomized, double-blind, placebo-controlled, cross-over | 12 weeks | Type 2 diabetes      | 15             | Fenofibrate 145 mg/day | 63±8     | 2/13    | 28.6±3.4 | 143.1±14.7 | 73.5±2.2   | 44.9±9.3  | 115.1±5.1 | 14.0±4.6  |
|                         |                                                          |          |                      | 15             | Placebo                | 63±8     | 2/13    | 28.5±3.0 | 139.2±14.7 | 73.5±2.2   | 41.8±12.0 | 97.4±7.9  | 13.8±5.4  |
| Davidson et al. (2006)  | Randomized, double-blind, placebo-controlled             | 8 weeks  | Hypertriglyceridemia | 96             | Fenofibrate 130 mg/day | 56.5±9.7 | 37/59   | 30.8±3.9 | 245±48.9   | 121±39.1   | 36±9.7    | 480±18.6  | 32±9.7    |
|                         |                                                          |          |                      | 50             | Placebo                | 55.3±7.0 | 20/30   | 31.5±4.9 | 237±42.4   | 116±42.4   | 35±7.0    | 479±14.8  | 30±7.0    |
| Ishibashi et al. (2016) | Randomized, double-blind, placebo-controlled             | 12 weeks | Dyslipidemia         | 36             | Fenofibrate 100 mg/day | 51.1±1.5 | 3/33    | 26.6±3.0 | 232.0±4.8  | 134.2±35.2 | 40.2±7.3  | 326.0±2.6 | 15.9±4.8  |
|                         |                                                          |          |                      | 35             | Placebo                | 48.7±9.0 | 1/34    | 26.8±2.6 | 225.1±3.0  | 128.4±29.4 | 40.2±6.2  | 309.1±1.2 | 14.9±4.5  |
| Kazumi et al. (2003)    | Randomized, double-blind, placebo-controlled, cross-     | 8 weeks  | Hypertriglyceridemia | 43             | Overall                | 57.1±9.1 | 5/38    | 24.3±2.6 |            |            |           |           |           |
|                         |                                                          |          |                      | 21             | Fenofibrate 300 mg/day | ND       | ND      | ND       | 238±45.8   | ND         | 40.0±10.0 | 352±27.4  | 17.9±8.2  |
|                         |                                                          |          |                      | 22             | Placebo                | ND       | ND      | ND       | 245±51     | ND         | 49.4±4.4  | 342±30    | 20.0±     |

|                                  |                                                                                    |                               |            |    |                               |                 |       |                     |                |                |               |                 |              |
|----------------------------------|------------------------------------------------------------------------------------|-------------------------------|------------|----|-------------------------------|-----------------|-------|---------------------|----------------|----------------|---------------|-----------------|--------------|
|                                  | over                                                                               |                               |            |    | Placebo                       |                 |       | .5                  |                | 23.9           | 4             | 11.7            |              |
| Kosog<br>lou et<br>al.<br>(2004) | Random<br>ized,<br>single-<br>blind,<br>placebo-<br>controlle<br>d                 | Dyslipide<br>mia              | 2<br>weeks | 8  | Fenofibr<br>ate 200<br>mg/day | ND              | ND    | ND                  | 239.8±<br>10.8 | 197.2±<br>32.8 | 50.3±<br>21.7 | 132.9±5<br>0.0  | 28.2±<br>4.8 |
|                                  |                                                                                    |                               |            | 8  | Placebo                       | ND              | ND    | ND                  | 266.8±         | 177.9±         | 46.4±         | 186.0±3         | 32.5±        |
|                                  |                                                                                    |                               |            |    |                               |                 |       |                     | 32.5           | 32.8           | 10.8          | 5.4             | 14.7         |
| Ooi et<br>al.<br>(2012)          | Random<br>ized,<br>double-<br>blind,<br>placebo-<br>controlle<br>d, cross-<br>over | Metaboli<br>c<br>syndrome     | 5<br>weeks | 11 | Overall                       | 46.3±6<br>.9    | 0/11  | 30.5±<br>2.6        |                |                |               |                 |              |
|                                  |                                                                                    |                               |            | 11 | Fenofibr<br>ate 200<br>mg/day |                 |       |                     | 211.9±<br>21.7 | 143.1±<br>22.8 | 40.2±<br>8.9  | 147.0±7<br>8.8  | 12.0±<br>1.4 |
|                                  |                                                                                    |                               |            | 11 | Placebo                       |                 |       |                     | 227.4±<br>18.9 | 152.4±<br>27.8 | 36.3±<br>5.0  | 216.1±9<br>0.3  | 15.5±<br>1.0 |
| Sasaki<br>et al.<br>(2002)       | Random<br>ized,<br>double-<br>blind,<br>placebo-<br>controlle<br>d, cross-<br>over | Hypertrig<br>lyce-<br>ridemia | 8<br>weeks | 50 | Overall                       | 54.6±1<br>2.7   | 19/31 | ND                  | 241.0±<br>65.7 | 119.2±<br>49.9 | 39.9±<br>11.6 | 431.8±3<br>05.5 | 21.7±<br>9.7 |
|                                  |                                                                                    |                               |            | 40 | Fenofibr<br>ate 300<br>mg/day |                 |       |                     |                |                |               |                 |              |
|                                  |                                                                                    |                               |            | 40 | Placebo                       |                 |       |                     |                |                |               |                 |              |
| Vega<br>et al.<br>(2003)         | Random<br>ized,<br>placebo-<br>controlle<br>d, cross-<br>over                      | Metaboli<br>c<br>syndrome     | 8<br>weeks | 13 | Overall                       | 56.5±8<br>.9    | 0/13  | 30.5±<br>4.2        | ND             | ND             | ND            | ND              | ND           |
|                                  |                                                                                    |                               |            | 13 | Fenofibr<br>ate 200<br>mg/day |                 |       |                     |                |                |               |                 |              |
|                                  |                                                                                    |                               |            | 13 | Placebo                       |                 |       |                     |                |                |               |                 |              |
| Wagne<br>r et al.<br>(2005)      | Random<br>ized,<br>open-<br>label,<br>placebo-<br>controlle<br>d, cross-           | Nondiabe<br>tic<br>subjects   | 2<br>weeks | 12 | Overall                       | 24 <sup>†</sup> | 0/12  | 27<br>(21-<br>34)** | ND             | ND             | ND            | ND              | ND           |
|                                  |                                                                                    |                               |            | 9  | Fenofibr<br>ate 201<br>mg/day | ND              | 0/9   | 34)**               | 170.1±<br>30.9 | 100.5±<br>23.2 | 34.8±<br>11.6 | 186.0±1<br>06.3 | 14.0±<br>5.7 |
|                                  |                                                                                    |                               |            | 9  | Placebo                       | ND              | 0/9   | ND                  | 150.8±         | 88.9±2         | 38.7±         | 132.9±6         | 10.5±        |
|                                  |                                                                                    |                               |            |    |                               |                 |       | ND                  | 30.9           | 7.1            | 7.7           | 2.0             | 2.7          |

---

 over
 

---

 Values are expressed as mean  $\pm$  SD

\*Geometric mean (95% CI)

\*\*Median (IQR)

†Mean only

Abbreviations: ND, no data; BMI, body mass index; IQR; interquartile range.

### Risk of bias assessment

Most of the included studies showed insufficient information regarding the sequence generation and allocation concealment. Moreover, three trials had high risk of bias concerning blinding of participants, personnel and outcome assessors<sup>36 40</sup>. Nevertheless, all selected studies were characterized by a low risk of bias for incomplete outcome data and selective outcome reporting.

Details of the risk of bias assessment are shown in **Table 2**.

**Table 2.** Quality of bias assessment of the included studies according to the Cochrane guidelines.

| Study                  | Sequence generation | Allocation concealment | Blinding of participants, personnel and outcome assessors | Incomplete outcome data | Selective outcome reporting | Other sources of bias |
|------------------------|---------------------|------------------------|-----------------------------------------------------------|-------------------------|-----------------------------|-----------------------|
| Belfort et al. (2010)  | L                   | U                      | U                                                         | L                       | L                           | U                     |
| Chan et al. (2010)     | U                   | U                      | U                                                         | L                       | L                           | U                     |
| Davidson et al. (2006) | U                   | U                      | U                                                         | L                       | L                           | U                     |



1  
2  
3  
4  
5  
6  
7  
8  
9  
10  
11  
12  
13  
14  
15  
16  
17  
18  
19  
20  
21  
22  
23  
24  
25  
26  
27  
28  
29  
30  
31  
32  
33  
34

|                         |   |   |   |   |   |   |
|-------------------------|---|---|---|---|---|---|
| Ishibashi et al. (2016) | L | U | U | L | L | U |
| Kazumi et al. (2003)    | U | U | U | L | L | U |
| Kosoglou et al. (2004)  | U | U | H | L | L | U |
| Ooi et al. (2012)       | U | U | U | L | L | U |
| Sasaki et al. (2002)    | U | L | U | L | L | U |
| Vega et al. (2003)      | U | U | H | L | L | U |
| Wagner et al. (2005)    | U | U | H | L | L | U |

35  
36  
37  
38  
39  
40  
41  
42  
43  
44  
45  
46  
47  
48  
49  
50  
51  
52  
53  
54  
55  
56  
57  
58  
59  
60

---

L, low risk of bias; H, high risk of bias; U, unclear risk of bias.

## Quantitative data synthesis

The present meta-analysis of data from 11 randomized placebo-controlled trials found a significant reduction of apo C-III plasma concentrations following treatment with fenofibrate (WMD: -4.56 mg/dL, 95% CI: -6.53, -2.58,  $p < 0.001$ ;  $I^2$ : 64.67%) (**Figure 2**). The effect size was robust in the leave-one-out sensitivity analysis (**Figure 2**) and not mainly driven by any single study. Subgroup analysis showed significant decreases in plasma apo C-III levels caused by fenofibrate in subgroups of trials with treatment durations of either  $< 12$  weeks (WMD: -4.48 mg/dL, 95% CI: -7.32, -1.64,  $p = 0.002$ ;  $I^2$ : 70.74%) or  $\geq 12$  weeks (WMD: -5.66 mg/dL, 95% CI: -10.15, -1.16,  $p = 0.014$ ;  $I^2$ : 69.61%), with no significant difference between the two subgroups ( $p = 0.664$ ). With respect to fenofibrate dose, significant reductions were observed in both subgroups of trials with administered doses of  $< 200$  mg/day (WMD: -6.33 mg/dL, 95% CI: -10.38, -2.27,  $p = 0.002$ ;  $I^2$ : 83.26%) and  $\geq 200$  mg/day (WMD: -3.47 mg/dL, 95% CI: -5.51, -1.42,  $p = 0.001$ ;  $I^2$ : 27.51%). Again, there was no significant difference between the subgroups treated with different fenofibrate doses ( $p = 0.217$ ) (**Figure 3**).

## Meta-regression

Random-effects meta-regression was performed to assess the impact of potential confounders on the effects of fenofibrate on plasma apo C-III levels. The results suggested a significant association between the apo C-III-lowering effect of fenofibrate with baseline apo C-III (slope: -0.40; 95% CI: -0.58, -0.22;  $p < 0.001$ ) and baseline triglyceride (slope: -0.02; 95% CI: -0.03, -0.01;  $p = 0.001$ ) concentrations. However, no significant association between the apo C-III-lowering and triglyceride-lowering effects of fenofibrate was found (slope: 0.11; 95% CI: -0.05,

0.27;  $p=0.185$ ) nor were there any association with baseline LDL-C (slope:  $-0.02$ ; 95% CI:  $-0.12$ ,  $0.08$ ;  $p=0.677$ ), HDL-C (slope:  $0.35$ ; 95% CI:  $-0.29$ ,  $0.98$ ;  $p=0.284$ ) and BMI (slope:  $-0.75$ ; 95% CI:  $-2.08$ ,  $0.58$ ;  $p=0.269$ ).

### Publication bias

Visual inspection of Begg's funnel plots revealed a slight asymmetry in the meta-analysis of fenofibrate's effect on plasma apo C-III levels that was imputed by one potentially missing study at the left side of the plot using "trim and fill" method that yielded an adjusted effect size of  $-5.18$  ( $-7.28$ ,  $-3.09$ ) (**Figure 4**). Begg's rank correlation ( $p=0.592$ ) and Egger's regression ( $p=0.718$ ) tests did not suggest the presence of publication bias. The results of "fail-safe N" test suggested that 153 missing studies would be required to make the observed significant result non-significant.

### DISCUSSION

In this meta-analysis of randomized placebo-controlled clinical trials, fenofibrate therapy was related to a significant reduction of apo C-III levels. Subanalyses revealed that this effect was observed even in those trials whose duration was less than 12 weeks and for doses of fenofibrate both higher and lower than 200 mg/day. Moreover, the apo C-III-lowering effect of fenofibrate was found to be directly proportional to baseline apo C-III and triglycerides levels, suggesting that greater effects on plasma apo C-III levels are anticipated in populations with hyperapoproteinemia C-III hypertriglyceridemia. However, there were no associations between apo C-III-lowering effect of fenofibrate with baseline BMI, LDL-C and HDL-C, and the

1  
2  
3 changes in plasma triglycerides levels. The latter finding on the lack of any association between  
4 changes in plasma apo C-III and triglycerides levels could be attributed to the fact that not all  
5 VLDL particles (as the main carriers of apo C-III in plasma) contain apo C-III. It has been  
6 estimated that apo C-III is present in about 50% of plasma VLDL particles. This might justify  
7 the lack of apo C-III reduction proportional to triglycerides reduction following fenofibrate  
8 therapy<sup>42</sup>.

9  
10 The reduction of apo C-III levels by fenofibrate therapy may contribute to a reduced risk of CAD  
11 achieved with fibrates therapy<sup>43 44 45</sup>; however, the mechanism(s) by which apo C-III increases  
12 CAD risk remain(s) unclear<sup>7</sup>. Loss of function mutations of the *APOC3* gene are associated with  
13 reduced triglyceride and VLDL levels<sup>46</sup>, whereas genetic variations have linked *APOC3* to CAD  
14 risk<sup>47</sup>. Epidemiological studies have found an association between increased apo C-III and CAD  
15 that correlated with elevated triglyceride levels<sup>48 49 50 7</sup>. It has also been shown that  
16 accumulation of apo C-III and triglycerides in the necrotic core predisposes to plaque  
17 vulnerability in patients with stable CAD<sup>51</sup>; hence, the significant lowering effect of fenofibrate  
18 on both of these parameters might justify its potential efficacy in preventing plaque rupture and  
19 acute CV events, as shown for statin therapy<sup>52</sup>. In addition, there is evidence *in vivo* showing the  
20 stabilizing and regressing effects of fenofibrate<sup>53 54</sup> on the atherosclerotic plaque. It has been  
21 shown that elevated triglycerides and low HDL-cholesterol are not only associated with  
22 macrovascular atherosclerotic changes such as CAD, but they are also risk factors for  
23 microvascular disease in type 2 diabetes mellitus<sup>43</sup>. Indeed, in addition to the association with  
24 elevated triglyceride-rich particles such as VLDL number and size, increased apo C-III levels  
25 were also related to increased IDL particles numbers and a shift to more atherogenic small dense  
26  
27  
28  
29  
30  
31  
32  
33  
34  
35  
36  
37  
38  
39  
40  
41  
42  
43  
44  
45  
46  
47  
48  
49  
50  
51  
52  
53

1  
2  
3 LDL particles <sup>7 20</sup>. Small dense LDL exerts atherogenic properties and has been linked to  
4 increased cardiovascular risk as well as to the presence of metabolic disorders including obesity,  
5 metabolic syndrome and type 2 diabetes <sup>55 56 57</sup>. Some speculate that it is quite unlikely that  
6 elevated triglycerides *per se* might be associated with an increased risk of CAD. However,  
7 triglyceride-rich particles such as VLDL and IDL could accumulate in the intima, and can be  
8 further catabolised and ingested by macrophages to form foam cells, resulting in progression of  
9 the atherosclerotic lesion <sup>58</sup>. Apo C-III may therefore be seen as a therapeutic target to reduce  
10 CAD and anti-sense RNA inhibition has shown dramatic decreases in triglyceride levels <sup>4 5</sup>.

11  
12  
13  
14  
15  
16  
17  
18  
19  
20  
21  
22  
23 In the EPIC study, mediation analysis showed that a large part of the increased CAD risk  
24 associated with apo C-III was attributable to the triglyceride-rich remnant particle levels <sup>7</sup>. This  
25 fits well with the mechanism proposed above. It has been also proven that fenofibrate decreases  
26 triglyceride-rich remnant particles <sup>59 60</sup>. However, it was also shown that apo C-III was associated  
27 with an increased C-reactive protein, a marker of inflammation that may represent an  
28 independent predictor of increased CAD risk <sup>61</sup>. This finding may also reflect the LPL-  
29 independent mechanism of increased CAD risk by apo C-III.

30  
31  
32  
33  
34  
35  
36  
37  
38  
39  
40 The present meta-analysis suggested that the effect of apoC-III lowering was relatively rapid as  
41 it was observed within 12 weeks, thus indicating the early potential benefit of fibrate therapy.  
42 However, no data exist that relate triglycerides reduction and remnant particles changes induced  
43 by apoC-III. Of note, the reduction of apoC-III levels was also observed with fenofibrate doses <  
44 200 mg/day, but it is unclear whether a reduction in apoC-III may occur even if in the absence of  
45 a therapeutic decrease in triglyceride levels.

1  
2  
3  
4 The main limitation of the present meta-analysis is that several trials were characterized by a  
5 small population size and a limited number of individuals. However, the pooled population  
6 analyzed was sufficiently robust due to other studies that provided a large population size. In  
7 addition, included studies did not define elevated plasma apo C-III levels among the inclusion  
8 criteria and hence future trials specifically defined in populations with hyperapolipoproteinemia  
9 C-III might be interesting. Finally, included the trials did not provide gender-stratified results for  
10 the impact of fenofibrate on plasma apo C-III levels; therefore, the presence of any gender effect  
11 on the apo C-III-lowering activity of fenofibrate needs to be evaluated in further studies.  
12  
13  
14  
15  
16  
17  
18  
19  
20  
21  
22

### 23 **Conclusion**

24  
25 The results of the present meta-analysis showed that fenofibrate treatment significantly decreases  
26 apoC-III levels, even with short-term treatment and doses < 200mg daily.  
27  
28  
29  
30  
31  
32  
33  
34  
35  
36  
37  
38  
39  
40  
41  
42  
43  
44  
45  
46  
47  
48  
49  
50  
51  
52  
53  
54  
55  
56  
57  
58  
59  
60

1  
2  
3  
4 **Funding.** This research did not receive any specific grant from funding agencies in the public,  
5  
6 commercial, or not-for-profit sectors.  
7  
8  
9

10  
11 **Conflict of interest.** NK has given talks, attended conferences and participated in trials  
12 sponsored by Amgen, Angelini, Astra Zeneca, Boehringer Ingelheim, Elpen, MSD, Novartis,  
13 NovoNordisk, Sanofi and WinMedica. MB has served on speaker's bureau and as an advisory  
14 board member for Amgen, Sanofi-Aventis and Lilly. Dr. Majeed is the Founder & Chairman of  
15 Sabinsa Corporation and Sami Labs Limited.  
16  
17  
18  
19  
20  
21  
22  
23  
24

#### 25 **Author Contribution statement.**

26 AS and LES contributed to the literature search, article screening, data acquisition and  
27 abstraction. AS contributed to the statistical analysis. SLA, AS and LES contributed to  
28 interpretation of the results and drafting of the manuscript. NK, ZR, MB and MP contributed to  
29 critical revision of the manuscript. All authors approved the final version of the manuscript for  
30 submission.  
31  
32  
33  
34  
35  
36  
37  
38  
39  
40

#### 41 **Data sharing statement**

42 All data is shown in the manuscript  
43  
44  
45  
46  
47  
48  
49  
50  
51  
52  
53

## REFERENCES

1. Sarwar N, Danesh J, Eiriksdottir G, et al. Triglycerides and the risk of coronary heart disease: 10,158 incident cases among 262,525 participants in 29 Western prospective studies. *Circulation* 2007;115(4):450-8. doi: 10.1161/circulationaha.106.637793 [published Online First: 2006/12/28]
2. Catapano AL, Graham I, De Backer G, et al. 2016 ESC/EAS Guidelines for the Management of Dyslipidaemias. *European heart journal* 2016;37(39):2999-3058. doi: 10.1093/eurheartj/ehw272 [published Online First: 2016/08/28]
3. Reiner Z. Hypertriglyceridaemia and risk of coronary artery disease. *Nature reviews Cardiology* 2017;14(7):401-11. doi: 10.1038/nrcardio.2017.31 [published Online First: 2017/03/17]
4. Gaudet D, Brisson D, Tremblay K, et al. Targeting APOC3 in the familial chylomicronemia syndrome. *The New England journal of medicine* 2014;371(23):2200-6. doi: 10.1056/NEJMoa1400284 [published Online First: 2014/12/04]
5. Gaudet D, Alexander VJ, Baker BF, et al. Antisense Inhibition of Apolipoprotein C-III in Patients with Hypertriglyceridemia. *The New England journal of medicine* 2015;373(5):438-47. doi: 10.1056/NEJMoa1400283 [published Online First: 2015/07/30]
6. Mendivil CO, Zheng C, Furtado J, et al. Metabolism of very-low-density lipoprotein and low-density lipoprotein containing apolipoprotein C-III and not other small apolipoproteins. *Arteriosclerosis, thrombosis, and vascular biology* 2010;30(2):239-45. doi: 10.1161/atvbaha.109.197830 [published Online First: 2009/11/17]
7. van Capelleveen JC, Bernelot Moens SJ, Yang X, et al. Apolipoprotein C-III Levels and Incident Coronary Artery Disease Risk: The EPIC-Norfolk Prospective Population Study. *Arteriosclerosis, thrombosis, and vascular biology* 2017;37(6):1206-12. doi: 10.1161/atvbaha.117.309007 [published Online First: 2017/05/06]
8. Zheng C. Updates on apolipoprotein CIII: fulfilling promise as a therapeutic target for hypertriglyceridemia and cardiovascular disease. *Current opinion in lipidology* 2014;25(1):35-9. doi: 10.1097/mol.000000000000040 [published Online First: 2013/12/19]
9. Shah A, Rader DJ, Millar JS. The effect of PPAR-alpha agonism on apolipoprotein metabolism in humans. *Atherosclerosis* 2010;210(1):35-40. doi: 10.1016/j.atherosclerosis.2009.11.010 [published Online First: 2009/12/17]
10. Fruchart JC, Sacks FM, Hermans MP, et al. The Residual Risk Reduction Initiative: a call to action to reduce residual vascular risk in dyslipidaemic patient. *Diabetes & vascular disease research* 2008;5(4):319-35. doi: 10.3132/dvdr.2008.046 [published Online First: 2008/10/30]
11. Chapman MJ, Ginsberg HN, Amarenco P, et al. Triglyceride-rich lipoproteins and high-density lipoprotein cholesterol in patients at high risk of cardiovascular disease: evidence and guidance for management. *European heart journal* 2011;32(11):1345-61. doi: 10.1093/eurheartj/ehr112 [published Online First: 2011/05/03]
12. Derosa G, Maffioli P, Sahebkar A. Plasma uric acid concentrations are reduced by fenofibrate: A systematic review and meta-analysis of randomized placebo-controlled trials. *Pharmacological research* 2015;102:63-70. doi: 10.1016/j.phrs.2015.09.012
13. Sahebkar A, Giua R, Pedone C, et al. Fibrate therapy and flow-mediated dilation: A systematic review and meta-analysis of randomized placebo-controlled trials. *Pharmacological research* 2016;111:163-79. doi: 10.1016/j.phrs.2016.06.011



14. Sahebkar A, Hernandez-Aguilera A, Abello D, et al. Systematic review and meta-analysis deciphering the impact of fibrates on paraoxonase-1 status. *Metabolism: clinical and experimental* 2016;65(5):609-22. doi: 10.1016/j.metabol.2016.01.002
15. Sahebkar A, Serban MC, Mikhailidis DP, et al. Head-to-head comparison of statins versus fibrates in reducing plasma fibrinogen concentrations: A systematic review and meta-analysis. *Pharmacological research* 2016;103:236-52. doi: 10.1016/j.phrs.2015.12.001
16. Sahebkar A, Simental-Mendia LE, Watts GF, et al. Impact of fibrate therapy on plasma plasminogen activator inhibitor-1: a systematic review and meta-analysis of randomized controlled trials. *Atherosclerosis* 2015;240(1):284-96. doi: 10.1016/j.atherosclerosis.2015.03.016
17. Sahebkar A, Simental-Mendia LE, Watts GF, et al. Comparison of the effects of fibrates versus statins on plasma lipoprotein(a) concentrations: a systematic review and meta-analysis of head-to-head randomized controlled trials. *BMC medicine* 2017;15(1):22. doi: 10.1186/s12916-017-0787-7
18. Sahebkar A, Watts GF. Fibrate therapy and circulating adiponectin concentrations: a systematic review and meta-analysis of randomized placebo-controlled trials. *Atherosclerosis* 2013;230(1):110-20. doi: 10.1016/j.atherosclerosis.2013.06.026
19. Farnier M. Update on the clinical utility of fenofibrate in mixed dyslipidemias: mechanisms of action and rational prescribing. *Vascular health and risk management* 2008;4(5):991-1000. [published Online First: 2009/02/03]
20. Katsiki N, Nikolic D, Montalto G, et al. The role of fibrate treatment in dyslipidemia: an overview. *Current pharmaceutical design* 2013;19(17):3124-31. [published Online First: 2013/01/16]
21. Vrablik M, Ceska R. Treatment of hypertriglyceridemia: a review of current options. *Physiological research* 2015;64 Suppl 3:S331-40. [published Online First: 2015/12/19]
22. Mansour M. The roles of peroxisome proliferator-activated receptors in the metabolic syndrome. *Progress in molecular biology and translational science* 2014;121:217-66. doi: 10.1016/b978-0-12-800101-1.00007-7 [published Online First: 2014/01/01]
23. Kersten S. Peroxisome proliferator activated receptors and lipoprotein metabolism. *PPAR research* 2008;2008:132960. doi: 10.1155/2008/132960 [published Online First: 2008/02/22]
24. Serban C, Sahebkar A, Ursoniu S, et al. A systematic review and meta-analysis of the effect of statins on plasma asymmetric dimethylarginine concentrations. *Scientific reports* 2015;5:9902. doi: 10.1038/srep09902
25. Moher D, Liberati A, Tetzlaff J, et al. Preferred reporting items for systematic reviews and meta-analyses: the PRISMA statement. *BMJ (Clinical research ed)* 2009;339:b2535. doi: 10.1136/bmj.b2535 [published Online First: 2009/07/23]
26. Higgins JPT GS, eds. *Cochrane Handbook for Systematic Reviews of Interventions*. London 2009.
27. Sahebkar A. Does PPARgamma2 gene Pro12Ala polymorphism affect nonalcoholic fatty liver disease risk? Evidence from a meta-analysis. *DNA and cell biology* 2013;32(4):188-98. doi: 10.1089/dna.2012.1947
28. Sahebkar A, Cicero AFG, Simental-Mendia LE, et al. Curcumin downregulates human tumor necrosis factor-alpha levels: A systematic review and meta-analysis of randomized controlled trials. *Pharmacological research* 2016;107:234-42. doi: 10.1016/j.phrs.2016.03.026
29. Duval S, Tweedie R. Trim and fill: A simple funnel-plot-based method of testing and adjusting for publication bias in meta-analysis. *Biometrics* 2000;56(2):455-63.
30. Belfort R, Berria R, Cornell J, et al. Fenofibrate reduces systemic inflammation markers independent of its effects on lipid and glucose metabolism in patients with the metabolic syndrome. *The*

- 1  
2  
3 *Journal of clinical endocrinology and metabolism* 2010;95(2):829-36. doi: 10.1210/jc.2009-1487  
4 [published Online First: 2010/01/12]  
5  
6 31. Chan DC, Hamilton SJ, Rye KA, et al. Fenofibrate concomitantly decreases serum proprotein  
7 convertase subtilisin/kexin type 9 and very-low-density lipoprotein particle concentrations in  
8 statin-treated type 2 diabetic patients. *Diabetes, obesity & metabolism* 2010;12(9):752-6. doi:  
9 10.1111/j.1463-1326.2010.01229.x [published Online First: 2010/07/24]  
10  
11 32. Davidson MH, Bays HE, Stein E, et al. Effects of fenofibrate on atherogenic dyslipidemia in  
12 hypertriglyceridemic subjects. *Clinical cardiology* 2006;29(6):268-73. [published Online First:  
13 2006/06/27]  
14  
15 33. Hamilton SJ, Chew GT, Davis TM, et al. Fenofibrate improves endothelial function in the brachial  
16 artery and forearm resistance arterioles of statin-treated Type 2 diabetic patients. *Clinical  
17 science (London, England : 1979)* 2010;118(10):607-15. doi: 10.1042/cs20090568 [published  
18 Online First: 2010/01/06]  
19  
20 34. Ishibashi S, Yamashita S, Arai H, et al. Effects of K-877, a novel selective PPARalpha modulator  
21 (SPPARMalpha), in dyslipidaemic patients: A randomized, double blind, active- and placebo-  
22 controlled, phase 2 trial. *Atherosclerosis* 2016;249:36-43. doi:  
23 10.1016/j.atherosclerosis.2016.02.029 [published Online First: 2016/04/12]  
24  
25 35. Kazumi T, Hirano T, Yoshino G, et al. Effects of fenofibrate on albuminuria in patients with  
26 hypertriglyceridemia and/or hyperuricemia: a multicenter, randomized, double-blind, placebo-  
27 controlled, crossover study. *Current therapeutic research, clinical and experimental*  
28 2003;64(7):434-46. doi: 10.1016/s0011-393x(03)00127-9 [published Online First: 2003/07/01]  
29  
30 36. Kosoglou T, Statkevich P, Fruchart JC, et al. Pharmacodynamic and pharmacokinetic interaction  
31 between fenofibrate and ezetimibe. *Current medical research and opinion* 2004;20(8):1197-207.  
32 doi: 10.1185/030079903125004277 [published Online First: 2004/08/25]  
33  
34 37. Ooi EM, Ng TW, Watts GF, et al. Effect of fenofibrate and atorvastatin on VLDL apoE metabolism in  
35 men with the metabolic syndrome. *Journal of lipid research* 2012;53(11):2443-9. doi:  
36 10.1194/jlr.P029223 [published Online First: 2012/08/30]  
37  
38 38. Sasaki J, Yamamoto K, Ageta M. Effects of fenofibrate on high-density lipoprotein particle size in  
39 patients with hyperlipidemia: a randomized, double-blind, placebo-controlled, multicenter,  
40 crossover study. *Clinical therapeutics* 2002;24(10):1614-26. [published Online First: 2002/12/05]  
41  
42 39. Vega GL, Cater NB, Hadizadeh DR, 3rd, et al. Free fatty acid metabolism during fenofibrate treatment  
43 of the metabolic syndrome. *Clinical pharmacology and therapeutics* 2003;74(3):236-44. doi:  
44 10.1016/s0009-9236(03)00170-x [published Online First: 2003/09/11]  
45  
46 40. Wagner JA, Larson PJ, Weiss S, et al. Individual and combined effects of peroxisome proliferator-  
47 activated receptor and {gamma} agonists, fenofibrate and rosiglitazone, on biomarkers of lipid  
48 and glucose metabolism in healthy nondiabetic volunteers. *Journal of clinical pharmacology*  
49 2005;45(5):504-13. doi: 10.1177/0091270004273136 [published Online First: 2005/04/16]  
50  
51 41. Grey A, Bolland M, Gamble G, et al. The peroxisome proliferator-activated receptor-gamma agonist  
52 rosiglitazone decreases bone formation and bone mineral density in healthy postmenopausal  
53 women: a randomized, controlled trial. *The Journal of clinical endocrinology and metabolism*  
54 2007;92(4):1305-10. doi: 10.1210/jc.2006-2646  
55  
56 42. Sacks FM, Zheng C, Cohn JS. Complexities of plasma apolipoprotein C-III metabolism. *J Lipid Res*  
57 2011;52(6):1067-70. doi: 10.1194/jlr.E015701 [published Online First: 2011/03/23]  
58  
59 43. Keech A, Simes RJ, Barter P, et al. Effects of long-term fenofibrate therapy on cardiovascular events  
60 in 9795 people with type 2 diabetes mellitus (the FIELD study): randomised controlled trial.

- 1  
2  
3 *Lancet (London, England)* 2005;366(9500):1849-61. doi: 10.1016/s0140-6736(05)67667-2  
4 [published Online First: 2005/11/29]
- 5  
6 44. Lee M, Saver JL, Towfighi A, et al. Efficacy of fibrates for cardiovascular risk reduction in persons with  
7 atherogenic dyslipidemia: a meta-analysis. *Atherosclerosis* 2011;217(2):492-8. doi:  
8 10.1016/j.atherosclerosis.2011.04.020 [published Online First: 2011/05/20]
- 9  
10 45. Rubins HB, Robins SJ, Collins D, et al. Diabetes, plasma insulin, and cardiovascular disease: subgroup  
11 analysis from the Department of Veterans Affairs high-density lipoprotein intervention trial (VA-  
12 HIT). *Archives of internal medicine* 2002;162(22):2597-604. [published Online First: 2002/12/03]
- 13  
14 46. Pollin TI, Damcott CM, Shen H, et al. A null mutation in human APOC3 confers a favorable plasma  
15 lipid profile and apparent cardioprotection. *Science (New York, NY)* 2008;322(5908):1702-5. doi:  
16 10.1126/science.1161524 [published Online First: 2008/12/17]
- 17  
18 47. Crosby J, Peloso GM, Auer PL, et al. Loss-of-function mutations in APOC3, triglycerides, and coronary  
19 disease. *The New England journal of medicine* 2014;371(1):22-31. doi: 10.1056/NEJMoa1307095  
20 [published Online First: 2014/06/19]
- 21  
22 48. Wyler von Ballmoos MC, Haring B, Sacks FM. The risk of cardiovascular events with increased  
23 apolipoprotein CIII: A systematic review and meta-analysis. *Journal of clinical lipidology*  
24 2015;9(4):498-510. doi: 10.1016/j.jacl.2015.05.002 [published Online First: 2015/08/01]
- 25  
26 49. Scheffer PG, Teerlink T, Dekker JM, et al. Increased plasma apolipoprotein C-III concentration  
27 independently predicts cardiovascular mortality: the Hoorn Study. *Clinical chemistry*  
28 2008;54(8):1325-30. doi: 10.1373/clinchem.2008.103234 [published Online First: 2008/06/17]
- 29  
30 50. Pechlaner R, Tsimikas S, Yin X, et al. Very-Low-Density Lipoprotein-Associated Apolipoproteins  
31 Predict Cardiovascular Events and Are Lowered by Inhibition of APOC-III. *Journal of the American*  
32 *College of Cardiology* 2017;69(7):789-800. doi: 10.1016/j.jacc.2016.11.065 [published Online  
33 First: 2017/02/18]
- 34  
35 51. Ohwada T, Watanabae K, Sakamoto T, et al. Apolipoprotein CIII and triglycerides in the necrotic core  
36 contribute to plaque vulnerability in patients with stable coronary disease. *European Journal of*  
37 *Cardiology* 2017;5(1):42-43.
- 38  
39 52. Gili S, Iannaccone M, Colombo F, et al. Effects of statins on plaque rupture assessed by optical  
40 coherence tomography in patients presenting with acute coronary syndromes: insights from the  
41 optical coherence tomography (OCT)-FORMIDABLE registry. *Eur Heart J Cardiovasc Imaging*  
42 2018;19(5):524-31. doi: 10.1093/ehjci/jex102 [published Online First: 2017/06/13]
- 43  
44 53. Jeanpierre E, Le Tourneau T, Zawadzki C, et al. Beneficial effects of fenofibrate on plaque  
45 thrombogenicity and plaque stability in atherosclerotic rabbits. *Cardiovasc Pathol*  
46 2009;18(3):140-7. doi: 10.1016/j.carpath.2008.03.001 [published Online First: 2008/04/26]
- 47  
48 54. Corti R, Osende J, Hutter R, et al. Fenofibrate induces plaque regression in hypercholesterolemic  
49 atherosclerotic rabbits: in vivo demonstration by high-resolution MRI. *Atherosclerosis*  
50 2007;190(1):106-13. doi: 10.1016/j.atherosclerosis.2006.02.036 [published Online First:  
51 2006/04/08]
- 52  
53 55. Oravec S, Dukat A, Gavornik P, et al. Atherogenic versus non-atherogenic lipoprotein profiles in  
54 healthy individuals. is there a need to change our approach to diagnosing dyslipidemia? *Current*  
55 *medicinal chemistry* 2014;21(25):2892-901. [published Online First: 2014/03/13]
- 56  
57 56. Mikhailidis DP, Elisaf M, Rizzo M, et al. "European panel on low density lipoprotein (LDL) subclasses":  
58 a statement on the pathophysiology, atherogenicity and clinical significance of LDL subclasses:  
59 executive summary. *Current vascular pharmacology* 2011;9(5):531-2. [published Online First:  
60 2011/05/21]

- 1  
2  
3 57. Katsiki N, Tentolouris N, Mikhailidis DP. Dyslipidaemia in type 2 diabetes mellitus: bad for the heart.  
4 *Current opinion in cardiology* 2017;32(4):422-29. doi: 10.1097/hco.0000000000000407  
5 [published Online First: 2017/04/01]  
6  
7 58. Lindqvist P, Ostlund-Lindqvist AM, Witztum JL, et al. The role of lipoprotein lipase in the metabolism  
8 of triglyceride-rich lipoproteins by macrophages. *The Journal of biological chemistry*  
9 1983;258(15):9086-92. [published Online First: 1983/08/10]  
10  
11 59. Ferrari R, Aguiar C, Alegria E, et al. Current practice in identifying and treating cardiovascular risk,  
12 with a focus on residual risk associated with atherogenic dyslipidaemia. *European heart journal*  
13 *supplements : journal of the European Society of Cardiology* 2016;18(Suppl C):C2-c12. doi:  
14 10.1093/eurheartj/suw009 [published Online First: 2017/05/24]  
15  
16 60. Aguiar C, Alegria E, Bonadonna RC, et al. A review of the evidence on reducing macrovascular risk in  
17 patients with atherogenic dyslipidaemia: A report from an expert consensus meeting on the role  
18 of fenofibrate-statin combination therapy. *Atherosclerosis Supplements* 2015;19:1-12. doi:  
19 10.1016/s1567-5688(15)30001-5 [published Online First: 2015/09/01]  
20  
21 61. Ridker PM, Danielson E, Fonseca FA, et al. Rosuvastatin to prevent vascular events in men and  
22 women with elevated C-reactive protein. *The New England journal of medicine*  
23 2008;359(21):2195-207. doi: 10.1056/NEJMoa0807646 [published Online First: 2008/11/11]  
24  
25  
26  
27  
28  
29  
30  
31  
32  
33  
34  
35  
36  
37  
38  
39  
40  
41  
42  
43  
44  
45  
46  
47  
48  
49  
50  
51  
52  
53

## FIGURE LEGENDS

**Figure 1.** Flow chart of the number of studies identified and included into the meta-analysis.

**Figure 2.** Forest plot displaying weighted mean difference and 95% confidence intervals for the effects of fenofibrate on circulating apolipoprotein C-III concentrations. The lower plot shows the results of leave-one-out sensitivity analysis. Analyses were performed using a random-effects model.

**Figure 3.** Forest plot displaying weighted mean difference and 95% confidence intervals for the effects of different doses ( $< 200$  mg/day vs.  $\geq 200$  mg/day) and durations ( $< 12$  weeks vs.  $\geq 12$  weeks) of treatment with fenofibrate on circulating apolipoprotein C-III concentrations. Analyses were performed using a random-effects model.

**Figure 4.** Random-effects funnel plot detailing publication bias in the studies reporting the impact of fenofibrate on plasma apo C-III concentrations.

**Supplementary File 1.** An example of search strategy in PubMed-Medline

1  
2  
3  
4  
5  
6  
7  
8  
9  
10  
11  
12  
13  
14  
15  
16  
17  
18  
19  
20  
21  
22  
23  
24  
25  
26  
27  
28  
29  
30  
31  
32  
33  
34  
35  
36  
37  
38  
39  
40  
41  
42  
43  
44  
45  
46  
47

For peer review only

1  
2  
3  
4  
5  
6  
7  
8  
9  
10  
11  
12  
13  
14  
15  
16  
17  
18  
19  
20  
21  
22  
23  
24  
25  
26  
27  
28  
29  
30  
31  
32  
33  
34  
35  
36  
37  
38  
39  
40  
41  
42  
43  
44  
45  
46  
47  
48  
49  
50  
51  
52  
53  
54  
55  
56  
57  
58  
59  
60

For peer review only

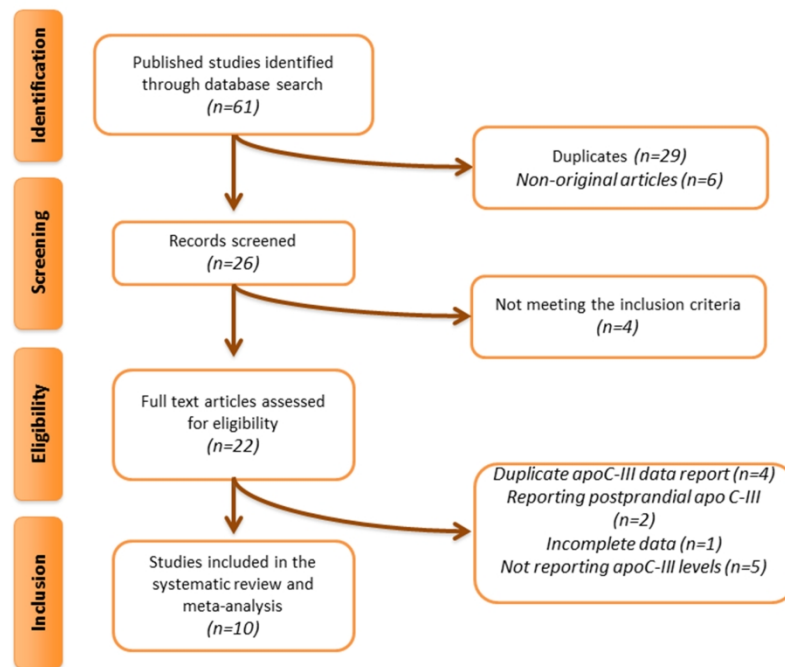

Figure 1. Flow chart of the number of studies identified and included into the meta-analysis.

254x190mm (300 x 300 DPI)



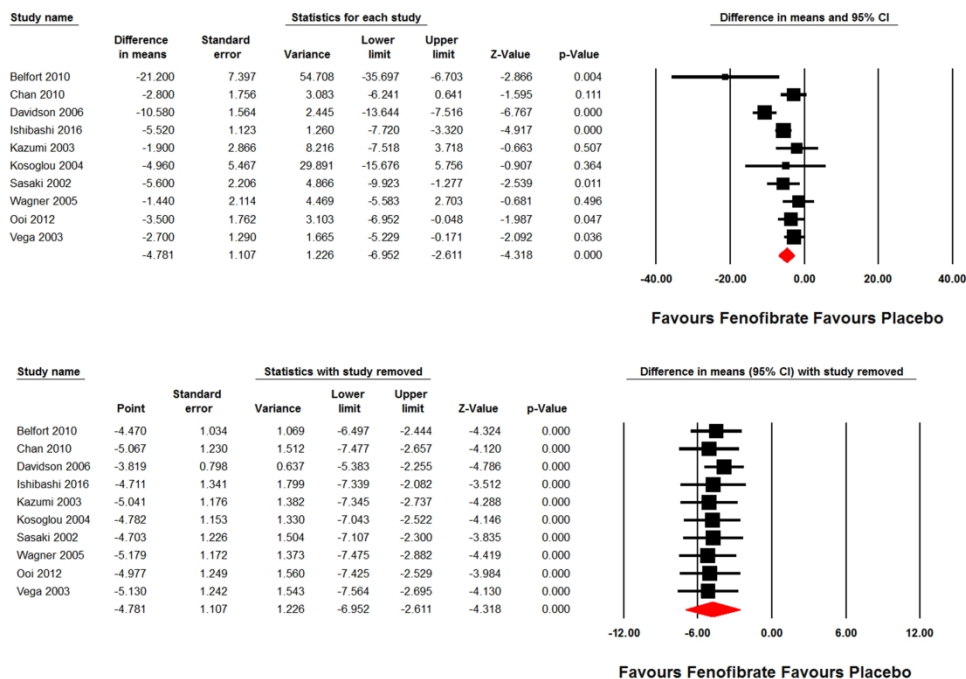

Figure 2. Forest plot displaying weighted mean difference and 95% confidence intervals for the effects of fenofibrate on circulating apolipoprotein C-III concentrations. The lower plot shows the results of leave-one-out sensitivity analysis. Analyses were performed using a random-effects model.

387x275mm (300 x 300 DPI)

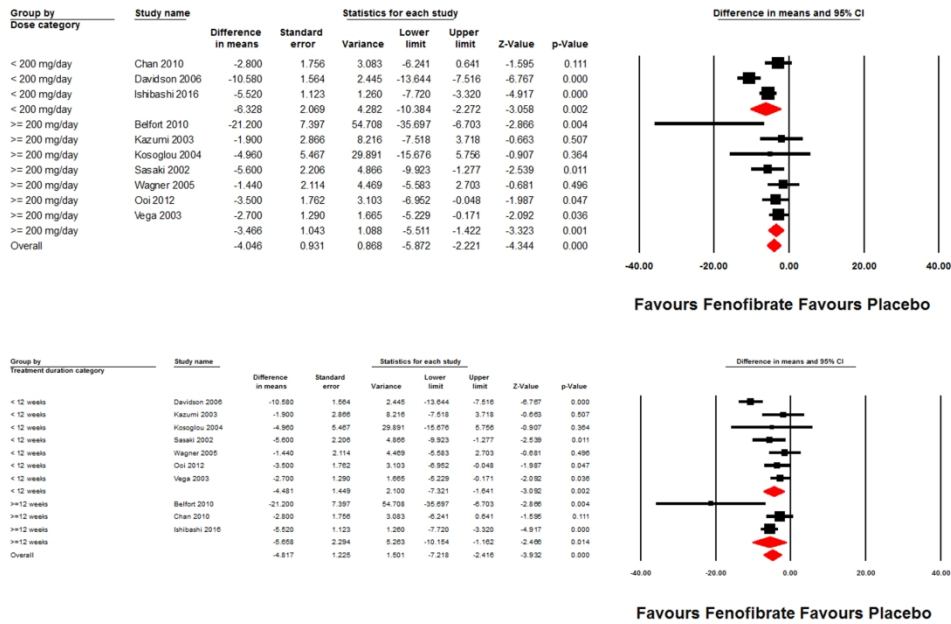

Figure 3. Forest plot displaying weighted mean difference and 95% confidence intervals for the effects of different doses (< 200 mg/day vs. ≥ 200 mg/day) and durations (< 12 weeks vs. ≥ 12 weeks) of treatment with fenofibrate on circulating apolipoprotein C-III concentrations. Analyses were performed using a random-effects model.

383x262mm (300 x 300 DPI)

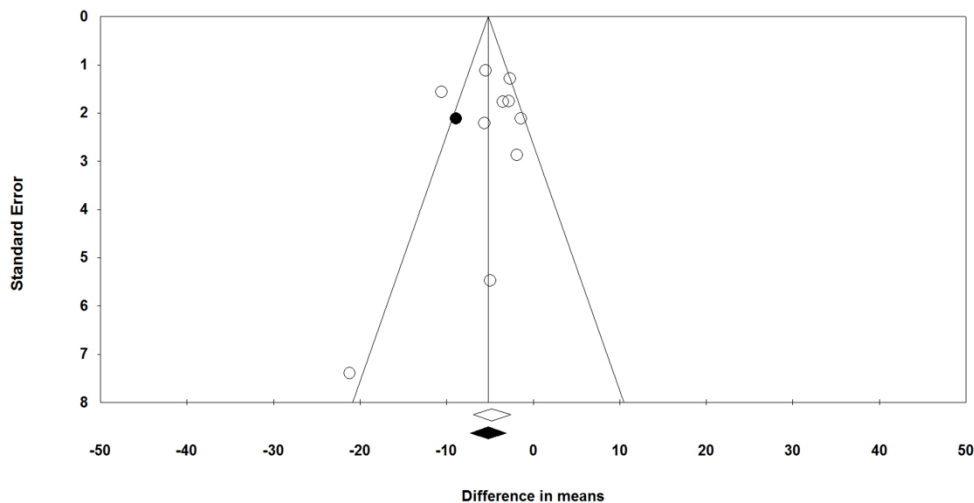

Figure 4. Random-effects funnel plot detailing publication bias in the studies reporting the impact of fenofibrate on plasma apo C-III concentrations.

457x234mm (299 x 299 DPI)

**Search query**

(fenofibrate[Title/Abstract] AND (placeb[Title/Abstract] OR placeba[Title/Abstract] OR placebased[Title/Abstract] OR placebocontrolled[Title/Abstract] OR placebo[Title/Abstract] OR placeboic[Title/Abstract] OR placeboic'[Title/Abstract] OR placebo[Title/Abstract] OR placebo'[Title/Abstract] OR placebo''[Title/Abstract] OR placebo's[Title/Abstract] OR placebo1[Title/Abstract] OR placebo2[Title/Abstract] OR placebo3[Title/Abstract] OR placebo4[Title/Abstract] OR placebo88[Title/Abstract] OR placeboaluminum[Title/Abstract] OR placeboamong[Title/Abstract] OR placeboand[Title/Abstract] OR placebobased[Title/Abstract] OR placebobisphosphonates[Title/Abstract] OR placeboch[Title/Abstract] OR placebocompared[Title/Abstract] OR placebocontrol[Title/Abstract] OR placebocontrolled[Title/Abstract] OR placebocorrected[Title/Abstract] OR placeboeffect[Title/Abstract] OR placeboes[Title/Abstract] OR placebofor[Title/Abstract] OR placebo gained[Title/Abstract] OR placebo genic[Title/Abstract] OR placebo genics[Title/Abstract] OR placebo group[Title/Abstract] OR placebo hbt[Title/Abstract] OR placebo implanted[Title/Abstract] OR placebo in[Title/Abstract] OR placebo kontrollierte[Title/Abstract] OR placebo kontrollierten[Title/Abstract] OR placebo like[Title/Abstract] OR placebo logy[Title/Abstract] OR placebo lotherapy[Title/Abstract] OR placebo me[Title/Abstract] OR placebo me'[Title/Abstract] OR placebo mental[Title/Abstract] OR placebo more[Title/Abstract] OR placebo movement[Title/Abstract] OR placebo n[Title/Abstract] OR placebo none[Title/Abstract] OR placebo nor[Title/Abstract] OR placebo one[Title/Abstract] OR placebo or[Title/Abstract] OR placebo our[Title/Abstract] OR placebo pdt[Title/Abstract] OR placebo pemetrexed[Title/Abstract] OR placebo per[Title/Abstract] OR placebo periode[Title/Abstract] OR placebo phenomenon[Title/Abstract] OR placebo phenytoin[Title/Abstract] OR placebo post1[Title/Abstract] OR placebo post10[Title/Abstract] OR placebo post19[Title/Abstract] OR placebo pre[Title/Abstract] OR placebo pre1[Title/Abstract] OR placebo pre10[Title/Abstract] OR placebo pre18[Title/Abstract] OR placebo r[Title/Abstract] OR placebo range[Title/Abstract] OR placebo results[Title/Abstract] OR placebo s[Title/Abstract] OR placebo s'[Title/Abstract] OR placebo scored[Title/Abstract] OR placebo stimulation[Title/Abstract] OR placebo the[Title/Abstract] OR placebo therapy[Title/Abstract] OR placebo there[Title/Abstract] OR placebo this[Title/Abstract] OR placebo treated[Title/Abstract] OR placebo two[Title/Abstract] OR placebo vmc[Title/Abstract] OR placebo w[Title/Abstract] OR placebo we[Title/Abstract] OR placebo when[Title/Abstract] OR placebo wirkung[Title/Abstract] OR placebo women[Title/Abstract] OR placebo xetine[Title/Abstract])) AND (("apolipoprotein c-iii"[MeSH Terms] OR ("apolipoprotein"[All Fields] AND "c-iii"[All Fields]) OR "apolipoprotein c-iii"[All Fields] OR ("apoc"[All Fields] AND "iii"[All Fields]) OR "apoc iii"[All Fields]) OR apociii[All Fields] OR "APO C-III"[All Fields] OR "APO CIII"[All Fields] OR apoc3[All Fields] OR "APO C3"[All Fields] OR "apolipoprotein CIII"[All Fields] OR "apolipoprotein C-III"[All Fields] OR "apolipoproteinCIII"[All Fields] OR "apolipoproteinC-III"[All Fields])

**Notes:**

All terms searched in title and abstract (here marked with Title/Abstract) and in MeSH (here marked with [Mesh]) when available.

No Filters or limitations applied

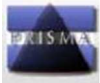

# PRISMA 2009 Checklist

| Section/topic                      | #  | Checklist item                                                                                                                                                                                                                                                                                              | Reported on page # |
|------------------------------------|----|-------------------------------------------------------------------------------------------------------------------------------------------------------------------------------------------------------------------------------------------------------------------------------------------------------------|--------------------|
| <b>TITLE</b>                       |    |                                                                                                                                                                                                                                                                                                             |                    |
| Title                              | 1  | Identify the report as a systematic review, meta-analysis, or both.                                                                                                                                                                                                                                         | 1                  |
| <b>ABSTRACT</b>                    |    |                                                                                                                                                                                                                                                                                                             |                    |
| Structured summary                 | 2  | Provide a structured summary including, as applicable: background; objectives; data sources; study eligibility criteria, participants, and interventions; study appraisal and synthesis methods; results; limitations; conclusions and implications of key findings; systematic review registration number. | 2                  |
| <b>INTRODUCTION</b>                |    |                                                                                                                                                                                                                                                                                                             |                    |
| Rationale                          | 3  | Describe the rationale for the review in the context of what is already known.                                                                                                                                                                                                                              | 4                  |
| Objectives                         | 4  | Provide an explicit statement of questions being addressed with reference to participants, interventions, comparisons, outcomes, and study design (PICOS).                                                                                                                                                  | 4                  |
| <b>METHODS</b>                     |    |                                                                                                                                                                                                                                                                                                             |                    |
| Protocol and registration          | 5  | Indicate if a review protocol exists, if and where it can be accessed (e.g., Web address), and, if available, provide registration information including registration number.                                                                                                                               | N/A                |
| Eligibility criteria               | 6  | Specify study characteristics (e.g., PICOS, length of follow-up) and report characteristics (e.g., years considered, language, publication status) used as criteria for eligibility, giving rationale.                                                                                                      | 5                  |
| Information sources                | 7  | Describe all information sources (e.g., databases with dates of coverage, contact with study authors to identify additional studies) in the search and date last searched.                                                                                                                                  | 5                  |
| Search                             | 8  | Present full electronic search strategy for at least one database, including any limits used, such that it could be repeated.                                                                                                                                                                               | 5                  |
| Study selection                    | 9  | State the process for selecting studies (i.e., screening, eligibility, included in systematic review, and, if applicable, included in the meta-analysis).                                                                                                                                                   | 5                  |
| Data collection process            | 10 | Describe method of data extraction from reports (e.g., piloted forms, independently, in duplicate) and any processes for obtaining and confirming data from investigators.                                                                                                                                  | 6                  |
| Data items                         | 11 | List and define all variables for which data were sought (e.g., PICOS, funding sources) and any assumptions and simplifications made.                                                                                                                                                                       | 6                  |
| Risk of bias in individual studies | 12 | Describe methods used for assessing risk of bias of individual studies (including specification of whether this was done at the study or outcome level), and how this information is to be used in any data synthesis.                                                                                      | 7                  |
| Summary measures                   | 13 | State the principal summary measures (e.g., risk ratio, difference in means).                                                                                                                                                                                                                               | 6                  |
| Synthesis of results               | 14 | Describe the methods of handling data and combining results of studies, if done, including measures of consistency (e.g., $I^2$ ) for each meta-analysis.                                                                                                                                                   | 6                  |

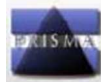

# PRISMA 2009 Checklist

Page 1 of 2

| Section/topic                 | #  | Checklist item                                                                                                                                                                                           | Reported on page #      |
|-------------------------------|----|----------------------------------------------------------------------------------------------------------------------------------------------------------------------------------------------------------|-------------------------|
| Risk of bias across studies   | 15 | Specify any assessment of risk of bias that may affect the cumulative evidence (e.g., publication bias, selective reporting within studies).                                                             | 11                      |
| Additional analyses           | 16 | Describe methods of additional analyses (e.g., sensitivity or subgroup analyses, meta-regression), if done, indicating which were pre-specified.                                                         | 7                       |
| <b>RESULTS</b>                |    |                                                                                                                                                                                                          |                         |
| Study selection               | 17 | Give numbers of studies screened, assessed for eligibility, and included in the review, with reasons for exclusions at each stage, ideally with a flow diagram.                                          | 8                       |
| Study characteristics         | 18 | For each study, present characteristics for which data were extracted (e.g., study size, PICOS, follow-up period) and provide the citations.                                                             | 8                       |
| Risk of bias within studies   | 19 | Present data on risk of bias of each study and, if available, any outcome level assessment (see item 12).                                                                                                | Page 11 and Table 2     |
| Results of individual studies | 20 | For all outcomes considered (benefits or harms), present, for each study: (a) simple summary data for each intervention group (b) effect estimates and confidence intervals, ideally with a forest plot. | Table 1, Figure 2 and 3 |
| Synthesis of results          | 21 | Present results of each meta-analysis done, including confidence intervals and measures of consistency.                                                                                                  | Figure 2 and 3          |
| Risk of bias across studies   | 22 | Present results of any assessment of risk of bias across studies (see Item 15).                                                                                                                          | 14                      |
| Additional analysis           | 23 | Give results of additional analyses, if done (e.g., sensitivity or subgroup analyses, meta-regression [see Item 16]).                                                                                    | 13 and Figure 4         |
| <b>DISCUSSION</b>             |    |                                                                                                                                                                                                          |                         |
| Summary of evidence           | 24 | Summarize the main findings including the strength of evidence for each main outcome; consider their relevance to key groups (e.g., healthcare providers, users, and policy makers).                     | 14                      |
| Limitations                   | 25 | Discuss limitations at study and outcome level (e.g., risk of bias), and at review-level (e.g., incomplete retrieval of identified research, reporting bias).                                            | 14                      |
| Conclusions                   | 26 | Provide a general interpretation of the results in the context of other evidence, and implications for future research.                                                                                  | 14                      |
| <b>FUNDING</b>                |    |                                                                                                                                                                                                          |                         |
| Funding                       | 27 | Describe sources of funding for the systematic review and other support (e.g., supply of data); role of funders for the systematic review.                                                               | 17                      |



# PRISMA 2009 Checklist

From: Moher D, Liberati A, Tetzlaff J, Altman DG, The PRISMA Group (2009). Preferred Reporting Items for Systematic Reviews and Meta-Analyses: The PRISMA Statement. PLoS Med 6(7): e1000097. doi:10.1371/journal.pmed1000097

For more information, visit: [www.prisma-statement.org](http://www.prisma-statement.org).

Page 2 of 2

For peer review only
